# Supplementary material for: Synthesis and phase purity of the negative thermal expansion material ZrV 2 O 7
Source: Royal Society of Chemistry journal article supplement (doi:10.1039/d4tc04095c), 2024-12-10
Supplement: d4tc04095c2.pdf [file d4tc04095c2.pdf]

## Supporting information

### Synthesis and phase purity of the negative thermal expansion material ZrV<sub>2</sub>O<sub>7</sub>

<sup>1,2</sup>Aistè Miliütè, <sup>1</sup>Joana Bustamante, <sup>1,2</sup>Stephanos Karafiludis, <sup>1,2</sup>Moritz Zöllner, <sup>1</sup>Mustapha Eddah,

<sup>1,2</sup>Franziska Emmerling, <sup>1</sup>Björn Mieller\*, <sup>1,3</sup>Janine George\*\*, <sup>1</sup>Tomasz M. Stawski\*\*\*

1 Federal Institute for Materials Research and Testing, Berlin, Germany.

2 Humboldt Universität zu Berlin, Department of Chemistry, Berlin, Germany.

3 Friedrich Schiller University of Jena, Institute of Solid-State Theory and Optics, Jena, Germany.

\*[bjorn.mieller@bam.de](mailto:bjorn.mieller@bam.de), \*\*[janine.george@bam.de](mailto:janine.george@bam.de), \*\*\*[tomasz.stawski@bam.de](mailto:tomasz.stawski@bam.de)

### Table of Contents

|                                                                      |    |
|----------------------------------------------------------------------|----|
| Particle size distribution .....                                     | 2  |
| Sample preparation .....                                             | 2  |
| Measurement procedure .....                                          | 2  |
| X-ray diffraction (XRD).....                                         | 3  |
| X-ray powder diffraction (Debye-Scherrer transmission geometry)..... | 3  |
| X-ray powder diffraction (Bragg-Brentano reflection geometry) .....  | 3  |
| Synchrotron experiments .....                                        | 3  |
| Phase quantification.....                                            | 3  |
| Sample: solid-state 40' 5h .....                                     | 4  |
| Commercially available ZrV <sub>2</sub> O <sub>7</sub> .....         | 8  |
| Sample: solid-state 180' 20 h × 3 .....                              | 12 |
| Sample: solid-state 40' 5 h N <sub>2</sub> -quenched .....           | 17 |
| Sample: solvothermal.....                                            | 21 |
| Sample: sol-gel_160 °C.....                                          | 25 |
| Sample: sol-gel_100 °C.....                                          | 28 |
| Sample: sol-gel_RO <sup>-</sup> .....                                | 31 |
| Sample: sol-gel_Cl .....                                             | 35 |
| Raman spectroscopy .....                                             | 38 |
| Experimental analysis.....                                           | 38 |
| Computational simulations .....                                      | 38 |
| Scanning electron microscopy (SEM) .....                             | 39 |
| Thermogravimetric analysis (TGA) .....                               | 39 |
| Method.....                                                          | 39 |
| Results .....                                                        | 39 |
| References.....                                                      | 40 |

## Particle size distribution

### Sample preparation

Ultrasonic sonotrode sonopuls HD 2200 with booster horn SH 213 and titanium sonotrode VS 70 T from Bandelin was used to disperse powders. Vanadium oxide and all mixed and ground powders were dispersed in 80 ml of ultrapure water (MiliQ, 18.2 M $\Omega$ ·cm at 25 °C). The zirconium oxide powder was dispersed in 80 ml 3 mmol/L sodium tetrphosphate solution.

The suspension was sonicated with pulsed ultrasound (50%/50%) at approx. 80% of the maximum power in staggered ultrasound times (initially for one minute, followed by two-minute steps), each of which was followed by a measurement.

### Measurement procedure

3-6 mL of the pre-dispersed suspensions were agitated at a stirring and pumping maximum speed of 3500 rpm. The scattered light data was recorded for 10 s for each wavelength (red laser - 633 nm and blue diode - 470 nm). One measurement consisted of 5 averaged individual data collections. The background of a corresponding particle-free dispersing liquid was determined before each measurement.

After recording the scattered light data, the particle size distribution was calculated. For the zirconium oxide, the evaluation was carried out using Mie-theory, considering the complex refractive index (real part  $n$  and imaginary part  $k$ ) of the sample and fluid. The following complex refractive index data were used:

$$\begin{aligned} n_{\text{red}}(\text{ZrO}_2) &= 2.152 & n_{\text{blue}}(\text{ZrO}_2) &= 2.189 & n(\text{fluid}) &= 1.33 \\ k_{\text{red}}(\text{ZrO}_2) &= 0.05 & k_{\text{blue}}(\text{ZrO}_2) &= 0.02 \end{aligned}$$

The measurements of vanadium oxide and all mixtures were evaluated using the Fraunhofer approximation, as the refractive index was either unknown or could not be specified.

**Table S1.** Summary and results of the particle size distribution analysis.

| R-Nr | Sample Description                                                                        | $d_{10.3}$ ,<br>( $\mu\text{m}$ ) | $d_{50.3}$ ,<br>( $\mu\text{m}$ ) | $d_{90.3}$ ,<br>( $\mu\text{m}$ ) | $d_{97.3}$ ,<br>( $\mu\text{m}$ ) | Liquid                                                 | Model | US  | US- %      |
|------|-------------------------------------------------------------------------------------------|-----------------------------------|-----------------------------------|-----------------------------------|-----------------------------------|--------------------------------------------------------|-------|-----|------------|
| 48   | Zirconium(IV)-oxide, commercial powder, Art.-Nr. 9303.1, 0.5 kg, Ch: 102321171, Carl Roth | 0.70                              | 1.81                              | 5.90                              | 9.8                               | 3 mmol/L Na <sub>4</sub> P <sub>2</sub> O <sub>7</sub> | Mie   | 5'  | 80%, 50/50 |
| 186  | Vanadium(V)-oxide, commercial powder, Art.-Nr. 008133, 0.5 kg, Ch: 120121, Chempur        | 0.56                              | 1.41                              | 3.71                              | 4.8                               | Water                                                  | Fh    | 13' | 80%, 50/50 |
| 174  | ZrO <sub>2</sub> + V <sub>2</sub> O <sub>5</sub> , planetary mill, 10 min                 | 0.50                              | 1.24                              | 3.42                              | 4.6                               | Water                                                  | Fh    | 7'  | 80%, 50/50 |
| 210  | ZrO <sub>2</sub> + V <sub>2</sub> O <sub>5</sub> , planetary mill, 40 min                 | 0.47                              | 1.22                              | 4.01                              | 5.8                               | Water                                                  | Fh    | 5'  | 80%, 50/50 |
| 192  | ZrO <sub>2</sub> + V <sub>2</sub> O <sub>5</sub> , planetary mill, 90 min                 | 0.42                              | 1.01                              | 2.66                              | 3.6                               | Water                                                  | Fh    | 5'  | 80%, 50/50 |
| 228  | ZrO <sub>2</sub> + V <sub>2</sub> O <sub>5</sub> , planetary mill, 120 min                | 0.41                              | 0.97                              | 2.56                              | 3.5                               | Water                                                  | Fh    | 5'  | 80%, 50/50 |
| 252  | ZrO <sub>2</sub> + V <sub>2</sub> O <sub>5</sub> , planetary mill, 180 min                | 0.38                              | 0.91                              | 2.36                              | 3.2                               | Water                                                  | Fh    | 5'  | 80%, 50/50 |

## X-ray diffraction (XRD)

### **X-ray powder diffraction (Debye-Scherrer transmission geometry)**

This method was used to collect diffraction patterns of sol-gel\_100 °C and sol-gel\_160 °C. XRD data was collected on a D8 Discover (Bruker, AXS, Germany) with Cu  $K_{\alpha}$  (1.54184 Å) radiation monochromatised via a Johansson monochromator. A Lynxeye XE Silicon strip detector was used for data acquisition in transmission geometry. The sample was loaded into a quartz capillary with an internal diameter of 1.0 mm. Diffraction data were collected at room temperature over a  $q$  range from 0.356 to 5.243 Å<sup>-1</sup> with a step size of 0.009° and a step time of 7 s. The total time per measurement was 16 hours. This relatively long measurement time is typical for measurements in transmission geometry.

### **X-ray powder diffraction (Bragg-Brentano reflection geometry)**

This method was used to collect diffraction patterns for all solid-state reactions and sol-gel\_RO<sup>-</sup>, sol-gel\_Cl, and solvothermal reaction products. Data was recorded with a D8 Advance diffractometer (Bruker AXS, Karlsruhe, Germany) equipped with an energy-dispersive LynxEye XE-T detector. The powder specimens were prepared in zero background sample holders. Measurements were performed with a copper X-ray source with a Cu  $K_{\alpha}$  wavelength of 1.54184 Å without a monochromator. The measurements were conducted in Bragg-Brentano geometry and an X-ray tube power of 40 kV, 40 mA. The selected parameters were as follows: 0.356 - 6.25 Å<sup>-1</sup> measurement range in a  $q$  scale, 0.01° step size, 1.15 s measurement time per step and 3 h total measurement time. The total time per measurement was 3 hours.

### **Synchrotron experiments**

High-quality XRD data of the sol-gel\_RO<sup>-</sup> synthesis product was collected in DESY PETRA III P02.1 Powder Diffraction and Total Scattering Beamline with fixed 60 keV energy ( $\lambda \sim 0.207$  Å). A Perkin Elmer XRD1621 area detector mounted on a long translation stage was used. Powders were loaded into a quartz capillary with an internal diameter of 1.0 mm. Diffraction data were collected at room temperature over a  $q$  range from 0.0015 to 5.47 Å<sup>-1</sup>.

### **Phase quantification**

Phase quantification was performed using Rietveld refinement with Match! software that uses the FullProf program<sup>1,2</sup>. Diffraction patterns in the range from 1.065 to 4.966 Å<sup>-1</sup> were used for refinements. The experimental pattern, Rietveld refinement, peak positions and difference plot are provided together with parameters used in Rietveld refinement.

Phase Analysis Report.  
Sample: solid-state 40' 5h

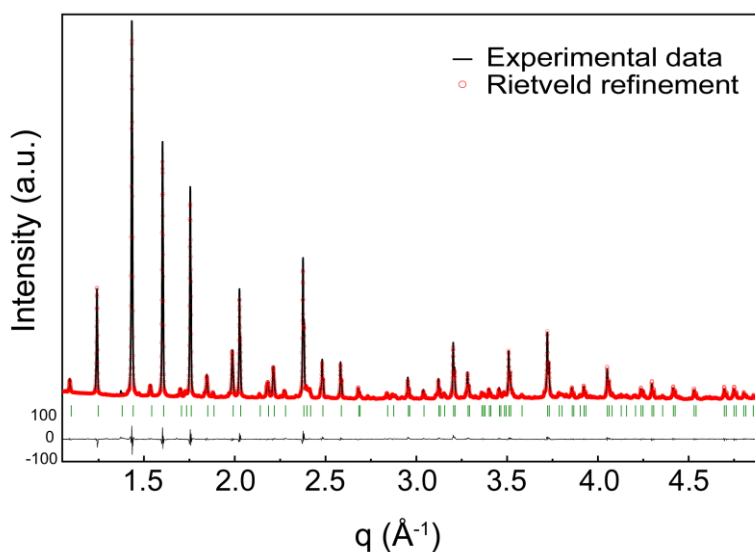

**Figure S1.** Rietveld refinement plot, showing the observed (black), calculated (red) and difference patterns of ZrV<sub>2</sub>O<sub>7</sub> solid-state 40' 5h sample. Vertical lines indicate the positions of the Bragg reflections.

**Sample and refinement data**

|                                                            |                         |
|------------------------------------------------------------|-------------------------|
| Data range                                                 | 13.908° - 75.055° 2θ    |
| Original data range                                        | 5.000° - 99.985°        |
| Step size                                                  | 0.010                   |
| Rietveld refinement converged                              | Yes                     |
| α2 subtracted                                              | No                      |
| Background subtracted                                      | No                      |
| Data smoothed                                              | No                      |
| Specimen displacement correction (Bragg-Brentano geometry) | T = (-s/R) = 0.00084333 |
| Radiation                                                  | X-rays                  |
| Method                                                     | Rietveld refinement     |
| Automatic refinement                                       | No                      |
| Final weighted average Bragg R factor                      | 4.3                     |
| Final reduced chi <sup>2</sup>                             | 8.8                     |

**Matched phases**

| Amount (%) | Name                   | Formula sum | COD ID  |
|------------|------------------------|-------------|---------|
| 72.9       |                        | O7 V2 Zr    | 2002983 |
| 15.6       | Shcherbinaite          | O5 V2       | 9012221 |
| 11.5       | Baddeleyite            | O2 Zr       | 9007485 |
| 3.5        | Unidentified peak area |             |         |

### Parameter List for Refinement

| Parameter         | Final value | Parameter    | Final value | Parameter      | Final value |
|-------------------|-------------|--------------|-------------|----------------|-------------|
| SyCos_pat1        | 0.0966386   | Occ_V16_ph1  | 1.01494     | Occ_O41_ph1    | 1           |
| Bck_0_pat1        | 0.983263    | X_V17_ph1    | 0.12459     | X_O42_ph1      | 0.26222     |
| Scale_ph1_pat1    | 8.88784E-07 | Y_V17_ph1    | 0.12459     | Y_O42_ph1      | 0.1951      |
| Cell_A_ph1_pat1   | 26.3207     | Z_V17_ph1    | 0.12459     | Z_O42_ph1      | 0.18376     |
| Scale_ph2_pat1    | 0.00167417  | Biso_V17_ph1 | 0.734       | Biso_O42_ph1   | 1.958       |
| Cell_A_ph2_pat1   | 11.5167     | Occ_V17_ph1  | 0.930779    | Occ_O42_ph1    | 1           |
| Cell_B_ph2_pat1   | 3.5635      | X_O18_ph1    | 0.48004     | X_O43_ph1      | 0.59815     |
| Cell_C_ph2_pat1   | 4.38044     | Y_O18_ph1    | 0.06539     | Y_O43_ph1      | -0.01624    |
| Scale_ph3_pat1    | 0.00116156  | Z_O18_ph1    | 0.1262      | Z_O43_ph1      | 0.03707     |
| Cell_A_ph3_pat1   | 5.14837     | Biso_O18_ph1 | 1.523       | Biso_O43_ph1   | 1.531       |
| Cell_B_ph3_pat1   | 5.20688     | Occ_O18_ph1  | 1           | Occ_O43_ph1    | 1           |
| Cell_C_ph3_pat1   | 5.31962     | X_O19_ph1    | 0.40009     | X_O44_ph1      | 0.06452     |
| Cell_E_ph3_pat1   | 99.2169     | Y_O19_ph1    | 0.12892     | Y_O44_ph1      | 0.14578     |
| Zero_pat1         | 0           | Z_O19_ph1    | 0.1466      | Z_O44_ph1      | 0.12622     |
| SySin_pat1        | 0           | Biso_O19_ph1 | 1.871       | Biso_O44_ph1   | 1.713       |
| Lambda_pat1       | 1.54187     | Occ_O19_ph1  | 1           | Occ_O44_ph1    | 1           |
| P0_mabs_pat1      | 0           | X_O20_ph1    | 0.47258     | X_O45_ph1      | 0.4973      |
| Cp_mabs_pat1      | 0           | Y_O20_ph1    | 0.15725     | Y_O45_ph1      | 0.155       |
| Tau_mabs_pat1     | 0.1         | Z_O20_ph1    | 0.07648     | Z_O45_ph1      | 0.1807      |
| Bck_1_pat1        | 1.73755     | Biso_O20_ph1 | 1.555       | Biso_O45_ph1   | 2.423       |
| Bck_2_pat1        | 0.000379844 | Occ_O20_ph1  | 1           | Occ_O45_ph1    | 1           |
| Bck_3_pat1        | -0.0167517  | X_O21_ph1    | 0.49048     | X_O46_ph1      | 0.5101      |
| Bover_ph1_pat1    | 0           | Y_O21_ph1    | 0.39627     | Y_O46_ph1      | 0.492       |
| Strain1_ph1_pat1  | 0           | Z_O21_ph1    | 0.12804     | Z_O46_ph1      | 0.1707      |
| Strain2_ph1_pat1  | 0           | Biso_O21_ph1 | 1.618       | Biso_O46_ph1   | 2.55        |
| Strain3_ph1_pat1  | 0           | Occ_O21_ph1  | 1           | Occ_O46_ph1    | 1           |
| G-Size_ph1_pat1   | 0           | X_O22_ph1    | 0.4726      | X_O47_ph1      | 0.3362      |
| L-Size_ph1_pat1   | 0           | Y_O22_ph1    | 0.48128     | Y_O47_ph1      | 0.3271      |
| Y-cos_ph1_pat1    | 0           | Z_O22_ph1    | 0.07129     | Z_O47_ph1      | 0.173       |
| EtaRght0_ph1_pat1 | 0           | Biso_O22_ph1 | 1.823       | Biso_O47_ph1   | 2.866       |
| X-tan_ph1_pat1    | 0.0174632   | Occ_O22_ph1  | 1           | Occ_O47_ph1    | 1           |
| U-Cagl_ph1_pat1   | 0           | X_O23_ph1    | 0.41032     | X_O48_ph1      | 0.3357      |
| V-Cagl_ph1_pat1   | 0           | Y_O23_ph1    | 0.45904     | Y_O48_ph1      | 0.1759      |
| W-Cagl_ph1_pat1   | 0.00657514  | Z_O23_ph1    | 0.15181     | Z_O48_ph1      | 0.0004      |
| EtaPV_ph1_pat1    | 0.0434719   | Biso_O23_ph1 | 1.594       | Biso_O48_ph1   | 2.645       |
| Cell_B_ph1_pat1   | 26.3207     | Occ_O23_ph1  | 1           | Occ_O48_ph1    | 1           |
| Cell_C_ph1_pat1   | 26.3207     | X_O24_ph1    | 0.3524      | X_O49_ph1      | 0.16284     |
| Cell_D_ph1_pat1   | 90          | Y_O24_ph1    | 0.3083      | Y_O49_ph1      | 0.16284     |
| Cell_E_ph1_pat1   | 90          | Z_O24_ph1    | 0.06917     | Z_O49_ph1      | 0.16284     |
| Cell_F_ph1_pat1   | 90          | Biso_O24_ph1 | 2.044       | Biso_O49_ph1   | 2.842       |
| Or1_ph1_pat1      | -0.0216295  | Occ_O24_ph1  | 1           | Occ_O49_ph1    | 1           |
| Or2_ph1_pat1      | 0           | X_O25_ph1    | 0.3565      | X_O50_ph1      | 0.5         |
| Asym1_ph1_pat1    | 0           | Y_O25_ph1    | 0.22994     | Y_O50_ph1      | 0.5         |
| Asym2_ph1_pat1    | 0.0238548   | Z_O25_ph1    | 0.1359      | Z_O50_ph1      | 0.5         |
| Asym3_ph1_pat1    | 0           | Biso_O25_ph1 | 2.218       | Biso_O50_ph1   | 2.85        |
| Asym4_ph1_pat1    | 0           | Occ_O25_ph1  | 1           | Occ_O50_ph1    | 1           |
| X_Zr1_ph1         | 0.497434    | X_O26_ph1    | 0.43193     | Bover_ph2_pat1 | 0           |

|              |           |              |          |                   |             |
|--------------|-----------|--------------|----------|-------------------|-------------|
| Y_Zr1_ph1    | -0.001114 | Y_O26_ph1    | 0.3013   | Strain1_ph2_pat1  | 0           |
| Z_Zr1_ph1    | 0.165602  | Z_O26_ph1    | 0.13571  | Strain2_ph2_pat1  | 0           |
| Biso_Zr1_ph1 | 0.497     | Biso_O26_ph1 | 1.91     | Strain3_ph2_pat1  | 0           |
| Occ_Zr1_ph1  | 0.960707  | Occ_O26_ph1  | 1        | G-Size_ph2_pat1   | 0           |
| X_Zr2_ph1    | 0.500084  | X_O27_ph1    | 0.23557  | L-Size_ph2_pat1   | 0           |
| Y_Zr2_ph1    | 0.32661   | Y_O27_ph1    | 0.3606   | Y-cos_ph2_pat1    | 0           |
| Z_Zr2_ph1    | 0.164329  | Z_O27_ph1    | 0.18436  | EtaRght0_ph2_pat1 | 0           |
| Biso_Zr2_ph1 | 0.481     | Biso_O27_ph1 | 1.879    | X-tan_ph2_pat1    | 0.0184458   |
| Occ_Zr2_ph1  | 1.10172   | Occ_O27_ph1  | 1        | U-Cagl_ph2_pat1   | 0           |
| X_Zr3_ph1    | 0.496217  | X_O28_ph1    | 0.3133   | V-Cagl_ph2_pat1   | 0           |
| Y_Zr3_ph1    | 0.170143  | Y_O28_ph1    | 0.42848  | W-Cagl_ph2_pat1   | 0.0125547   |
| Z_Zr3_ph1    | 0.34384   | Z_O28_ph1    | 0.1951   | EtaPV_ph2_pat1    | 0.138715    |
| Biso_Zr3_ph1 | 0.426     | Biso_O28_ph1 | 2.029    | Cell_D_ph2_pat1   | 90          |
| Occ_Zr3_ph1  | 0.960551  | Occ_O28_ph1  | 1        | Cell_E_ph2_pat1   | 90          |
| X_Zr4_ph1    | 0.331355  | X_O29_ph1    | 0.29834  | Cell_F_ph2_pat1   | 90          |
| Y_Zr4_ph1    | 0.162024  | Y_O29_ph1    | 0.35604  | Or1_ph2_pat1      | 0           |
| Z_Zr4_ph1    | 0.166102  | Z_O29_ph1    | 0.26787  | Or2_ph2_pat1      | 0           |
| Biso_Zr4_ph1 | 0.505     | Biso_O29_ph1 | 1.831    | Asym1_ph2_pat1    | 0           |
| Occ_Zr4_ph1  | 0.998362  | Occ_O29_ph1  | 1        | Asym2_ph2_pat1    | 0           |
| X_Zr5_ph1    | 0.334645  | X_O30_ph1    | 0.3018   | Asym3_ph2_pat1    | 0           |
| Y_Zr5_ph1    | 0.334645  | Y_O30_ph1    | 0.14271  | Asym4_ph2_pat1    | 0           |
| Z_Zr5_ph1    | 0.334645  | Z_O30_ph1    | 0.09573  | X_V1_ph2          | 0.60299     |
| Biso_Zr5_ph1 | 0.536     | Biso_O30_ph1 | 1.792    | Y_V1_ph2          | 0.25        |
| Occ_Zr5_ph1  | 0.928984  | Occ_O30_ph1  | 1        | Z_V1_ph2          | 0.10574     |
| X_Zr6_ph1    | 0         | X_O31_ph1    | 0.24174  | Biso_V1_ph2       | 1.4285      |
| Y_Zr6_ph1    | 0         | Y_O31_ph1    | 0.12759  | Occ_V1_ph2        | 0.980082    |
| Z_Zr6_ph1    | 0         | Z_O31_ph1    | 0.01154  | X_O2_ph2          | 0.42586     |
| Biso_Zr6_ph1 | 0.505     | Biso_O31_ph1 | 1.65     | Y_O2_ph2          | 0.25        |
| Occ_Zr6_ph1  | 0.847517  | Occ_O31_ph1  | 1        | Z_O2_ph2          | -0.00275127 |
| X_V7_ph1     | 0.46207   | X_O32_ph1    | 0.32893  | Biso_O2_ph2       | 1.3319      |
| Y_V7_ph1     | 0.12653   | Y_O32_ph1    | 0.07216  | Occ_O2_ph2        | 1.06267     |
| Z_V7_ph1     | 0.13145   | Z_O32_ph1    | 0.02455  | X_O3_ph2          | 0.6046      |
| Biso_V7_ph1  | 0.781     | Biso_O32_ph1 | 1.689    | Y_O3_ph2          | 0.25        |
| Occ_V7_ph1   | 1.0171    | Occ_O32_ph1  | 1        | Z_O3_ph2          | 0.4572      |
| X_V8_ph1     | 0.4703    | X_O33_ph1    | 0.35597  | Biso_O3_ph2       | 1.3902      |
| Y_V8_ph1     | 0.45683   | Y_O33_ph1    | 0.27237  | Occ_O3_ph2        | 1.09045     |
| Z_V8_ph1     | 0.12993   | Z_O33_ph1    | -0.03702 | X_O4_ph2          | 0.25        |
| Biso_V8_ph1  | 0.742     | Biso_O33_ph1 | 1.587    | Y_O4_ph2          | 0.75        |
| Occ_V8_ph1   | 0.92225   | Occ_O33_ph1  | 1        | Z_O4_ph2          | 0.0008      |
| X_V9_ph1     | 0.36952   | X_O34_ph1    | 0.43498  | Biso_O4_ph2       | 1.6936      |
| Y_V9_ph1     | 0.29152   | Y_O34_ph1    | 0.20653  | Occ_O4_ph2        | 1.03565     |
| Z_V9_ph1     | 0.12774   | Z_O34_ph1    | -0.01851 | Bover_ph3_pat1    | 0           |
| Biso_V9_ph1  | 0.742     | Biso_O34_ph1 | 1.721    | Strain1_ph3_pat1  | 0           |
| Occ_V9_ph1   | 1.03972   | Occ_O34_ph1  | 1        | Strain2_ph3_pat1  | 0           |

|              |          |              |          |                   |            |
|--------------|----------|--------------|----------|-------------------|------------|
| X_V10_ph1    | 0.29521  | X_O35_ph1    | 0.37015  | Strain3_ph3_pat1  | 0          |
| Y_V10_ph1    | 0.36857  | Y_O35_ph1    | 0.18931  | G-Size_ph3_pat1   | 0          |
| Z_V10_ph1    | 0.20539  | Z_O35_ph1    | -0.09934 | L-Size_ph3_pat1   | 0          |
| Biso_V10_ph1 | 0.757    | Biso_O35_ph1 | 1.808    | Y-cos_ph3_pat1    | 0          |
| Occ_V10_ph1  | 1.03663  | Occ_O35_ph1  | 1        | EtaRght0_ph3_pat1 | 0          |
| X_V11_ph1    | 0.30164  | X_O36_ph1    | 0.5206   | X-tan_ph3_pat1    | 0.00575546 |
| Y_V11_ph1    | 0.12878  | Y_O36_ph1    | 0.53508  | U-Cagl_ph3_pat1   | 0          |
| Z_V11_ph1    | 0.03361  | Z_O36_ph1    | 0.26734  | V-Cagl_ph3_pat1   | 0          |
| Biso_V11_ph1 | 0.679    | Biso_O36_ph1 | 1.744    | W-Cagl_ph3_pat1   | 0.0114984  |
| Occ_V11_ph1  | 1.04149  | Occ_O36_ph1  | 1        | EtaPV_ph3_pat1    | 0.381377   |
| X_V12_ph1    | 0.37478  | X_O37_ph1    | 0.51715  | Cell_D_ph3_pat1   | 90         |
| Y_V12_ph1    | 0.21139  | Y_O37_ph1    | 0.59745  | Cell_F_ph3_pat1   | 90         |
| Z_V12_ph1    | -0.0395  | Z_O37_ph1    | 0.18395  | Or1_ph3_pat1      | 0          |
| Biso_V12_ph1 | 0.765    | Biso_O37_ph1 | 1.871    | Or2_ph3_pat1      | 0          |
| Occ_V12_ph1  | 0.933972 | Occ_O37_ph1  | 1        | Asym1_ph3_pat1    | 0          |
| X_V13_ph1    | 0.53727  | X_O38_ph1    | 0.60074  | Asym2_ph3_pat1    | 0          |
| Y_V13_ph1    | 0.54143  | Y_O38_ph1    | 0.53739  | Asym3_ph3_pat1    | 0          |
| Z_V13_ph1    | 0.20594  | Z_O38_ph1    | 0.20051  | Asym4_ph3_pat1    | 0          |
| Biso_V13_ph1 | 0.757    | Biso_O38_ph1 | 1.808    | X_Zr1_ph3         | 0.27882    |
| Occ_V13_ph1  | 1.0105   | Occ_O38_ph1  | 1        | Y_Zr1_ph3         | 0.040319   |
| X_V14_ph1    | 0.53403  | X_O39_ph1    | 0.51072  | Z_Zr1_ph3         | 0.20967    |
| Y_V14_ph1    | 0.20035  | Y_O39_ph1    | 0.25854  | Biso_Zr1_ph3      | 1.4753     |
| Z_V14_ph1    | 0.21313  | Z_O39_ph1    | 0.20207  | Occ_Zr1_ph3       | 0.995115   |
| Biso_V14_ph1 | 0.726    | Biso_O39_ph1 | 1.823    | X_O2_ph3          | 0.061764   |
| Occ_V14_ph1  | 0.994503 | Occ_O39_ph1  | 1        | Y_O2_ph3          | 0.33566    |
| X_V15_ph1    | 0.20147  | X_O40_ph1    | 0.59407  | Z_O2_ph3          | 0.34319    |
| Y_V15_ph1    | 0.20147  | Y_O40_ph1    | 0.19718  | Biso_O2_ph3       | 0.54183    |
| Z_V15_ph1    | 0.20147  | Z_O40_ph1    | 0.19242  | Occ_O2_ph3        | 1.0264     |
| Biso_V15_ph1 | 0.813    | Biso_O40_ph1 | 1.808    | X_O3_ph3          | 0.44045    |
| Occ_V15_ph1  | 0.940115 | Occ_O40_ph1  | 1        | Y_O3_ph3          | 0.75931    |
| X_V16_ph1    | 0.53834  | X_O41_ph1    | 0.5323   | Z_O3_ph3          | 0.47982    |
| Y_V16_ph1    | 0.53834  | Y_O41_ph1    | 0.18804  | Biso_O3_ph3       | 0.10994    |
| Z_V16_ph1    | 0.53834  | Z_O41_ph1    | 0.2758   | Occ_O3_ph3        | 1.01494    |
| Biso_V16_ph1 | 0.686    | Biso_O41_ph1 | 1.847    |                   |            |

Phase Analysis Report.  
Commercially available ZrV<sub>2</sub>O<sub>7</sub>

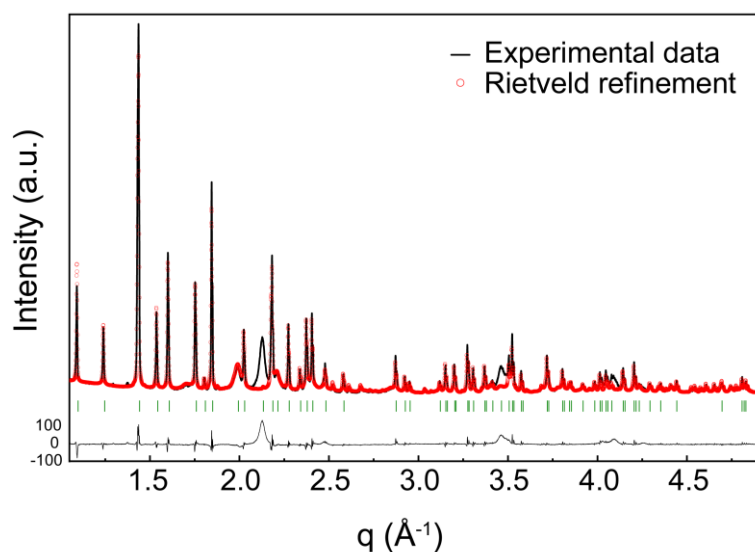

**Figure S2.** Rietveld refinement plot, showing the observed (black), calculated (red) and difference patterns of commercially available ZrV<sub>2</sub>O<sub>7</sub>. Vertical lines indicate the positions of the Bragg reflections.

**Sample and refinement data**

|                                                            |                              |
|------------------------------------------------------------|------------------------------|
| Data range                                                 | 14.315° - 77.087° 2 $\theta$ |
| Original data range                                        | 5.000° - 99.985°             |
| Step size                                                  | 0.010                        |
| Rietveld refinement converged                              | Yes                          |
| $\alpha_2$ subtracted                                      | No                           |
| Background subtracted                                      | No                           |
| Data smoothed                                              | No                           |
| Specimen displacement correction (Bragg-Brentano geometry) | $T = (-s/R) = 0.0011664$     |
| Radiation                                                  | X-rays                       |
| Method                                                     | Rietveld refinement          |
| Automatic refinement                                       | No                           |
| Final weighted average Bragg R factor                      | 17.0                         |
| Final reduced $\chi^2$                                     | 77.1                         |

**Matched phases**

| Amount (%) | Name                   | Formula sum | COD ID  |
|------------|------------------------|-------------|---------|
| 26.5       |                        | O7 V2 Zr    | 2002983 |
| 56.6       | Shcherbinaite          | O5 V2       | 9012221 |
| 16.9       | Baddeleyite            | O2 Zr       | 9007485 |
| 11.2       | Unidentified peak area |             |         |



### Parameter List for Refinement

| Parameter         | Final value | Parameter    | Final value | Parameter    | Final value |
|-------------------|-------------|--------------|-------------|--------------|-------------|
| SyCos_pat1        | 0.133662    | Y_V9_ph2     | 0.29152     | Y_O34_ph2    | 0.20653     |
| Scale_ph1_pat1    | 0.00613601  | Z_V9_ph2     | 0.12774     | Z_O34_ph2    | -0.01851    |
| Cell_A_ph1_pat1   | 11.5131     | Biso_V9_ph2  | 0.742       | Biso_O34_ph2 | 1.721       |
| Cell_B_ph1_pat1   | 3.56428     | Occ_V9_ph2   | 1           | Occ_O34_ph2  | 1           |
| Cell_C_ph1_pat1   | 4.37331     | X_V10_ph2    | 0.29521     | X_O35_ph2    | 0.37015     |
| Asym2_ph1_pat1    | 0.0159459   | Y_V10_ph2    | 0.36857     | Y_O35_ph2    | 0.18931     |
| Scale_ph2_pat1    | 3.11875E-07 | Z_V10_ph2    | 0.20539     | Z_O35_ph2    | -0.09934    |
| Scale_ph3_pat1    | 0.00172638  | Biso_V10_ph2 | 0.757       | Biso_O35_ph2 | 1.808       |
| Zero_pat1         | 0           | Occ_V10_ph2  | 1           | Occ_O35_ph2  | 1           |
| SySin_pat1        | 0           | X_V11_ph2    | 0.30164     | X_O36_ph2    | 0.5206      |
| Lambda_pat1       | 1.54187     | Y_V11_ph2    | 0.12878     | Y_O36_ph2    | 0.53508     |
| P0_mabs_pat1      | 0           | Z_V11_ph2    | 0.03361     | Z_O36_ph2    | 0.26734     |
| Cp_mabs_pat1      | 0           | Biso_V11_ph2 | 0.679       | Biso_O36_ph2 | 1.744       |
| Tau_mabs_pat1     | 0.1         | Occ_V11_ph2  | 1           | Occ_O36_ph2  | 1           |
| Bck_0_pat1        | 0.966494    | X_V12_ph2    | 0.37478     | X_O37_ph2    | 0.51715     |
| Bck_1_pat1        | 6.61292     | Y_V12_ph2    | 0.21139     | Y_O37_ph2    | 0.59745     |
| Bck_2_pat1        | -0.0188351  | Z_V12_ph2    | -0.0395     | Z_O37_ph2    | 0.18395     |
| Bck_3_pat1        | 0           | Biso_V12_ph2 | 0.765       | Biso_O37_ph2 | 1.871       |
| Bover_ph1_pat1    | 0           | Occ_V12_ph2  | 1           | Occ_O37_ph2  | 1           |
| Strain1_ph1_pat1  | 0           | X_V13_ph2    | 0.53727     | X_O38_ph2    | 0.60074     |
| Strain2_ph1_pat1  | 0           | Y_V13_ph2    | 0.54143     | Y_O38_ph2    | 0.53739     |
| Strain3_ph1_pat1  | 0           | Z_V13_ph2    | 0.20594     | Z_O38_ph2    | 0.20051     |
| G-Size_ph1_pat1   | 0           | Biso_V13_ph2 | 0.757       | Biso_O38_ph2 | 1.808       |
| L-Size_ph1_pat1   | 0           | Occ_V13_ph2  | 1           | Occ_O38_ph2  | 1           |
| Y-cos_ph1_pat1    | 0           | X_V14_ph2    | 0.53403     | X_O39_ph2    | 0.51072     |
| EtaRght0_ph1_pat1 | 0           | Y_V14_ph2    | 0.20035     | Y_O39_ph2    | 0.25854     |
| X-tan_ph1_pat1    | 0.0134638   | Z_V14_ph2    | 0.21313     | Z_O39_ph2    | 0.20207     |
| U-Cagl_ph1_pat1   | 0           | Biso_V14_ph2 | 0.726       | Biso_O39_ph2 | 1.823       |
| V-Cagl_ph1_pat1   | 0           | Occ_V14_ph2  | 1           | Occ_O39_ph2  | 1           |
| W-Cagl_ph1_pat1   | 0.00586025  | X_V15_ph2    | 0.20147     | X_O40_ph2    | 0.59407     |
| EtaPV_ph1_pat1    | 0.308864    | Y_V15_ph2    | 0.20147     | Y_O40_ph2    | 0.19718     |
| Cell_D_ph1_pat1   | 90          | Z_V15_ph2    | 0.20147     | Z_O40_ph2    | 0.19242     |
| Cell_E_ph1_pat1   | 90          | Biso_V15_ph2 | 0.813       | Biso_O40_ph2 | 1.808       |
| Cell_F_ph1_pat1   | 90          | Occ_V15_ph2  | 1           | Occ_O40_ph2  | 1           |
| Or1_ph1_pat1      | 0           | X_V16_ph2    | 0.53834     | X_O41_ph2    | 0.5323      |
| Or2_ph1_pat1      | 0           | Y_V16_ph2    | 0.53834     | Y_O41_ph2    | 0.18804     |
| Asym1_ph1_pat1    | 0           | Z_V16_ph2    | 0.53834     | Z_O41_ph2    | 0.2758      |
| Asym3_ph1_pat1    | 0           | Biso_V16_ph2 | 0.686       | Biso_O41_ph2 | 1.847       |
| Asym4_ph1_pat1    | 0           | Occ_V16_ph2  | 1           | Occ_O41_ph2  | 1           |
| X_V1_ph1          | 0.60123     | X_V17_ph2    | 0.12459     | X_O42_ph2    | 0.26222     |
| Y_V1_ph1          | 0.25        | Y_V17_ph2    | 0.12459     | Y_O42_ph2    | 0.1951      |
| Z_V1_ph1          | 0.1086      | Z_V17_ph2    | 0.12459     | Z_O42_ph2    | 0.18376     |
| Biso_V1_ph1       | 0.592       | Biso_V17_ph2 | 0.734       | Biso_O42_ph2 | 1.958       |
| Occ_V1_ph1        | 1           | Occ_V17_ph2  | 1           | Occ_O42_ph2  | 1           |
| X_O2_ph1          | 0.4309      | X_O18_ph2    | 0.48004     | X_O43_ph2    | 0.59815     |
| Y_O2_ph1          | 0.25        | Y_O18_ph2    | 0.06539     | Y_O43_ph2    | -0.01624    |

|                   |            |              |         |                   |           |
|-------------------|------------|--------------|---------|-------------------|-----------|
| Z_O2_ph1          | -0.0028    | Z_O18_ph2    | 0.1262  | Z_O43_ph2         | 0.03707   |
| Biso_O2_ph1       | 0.781      | Biso_O18_ph2 | 1.523   | Biso_O43_ph2      | 1.531     |
| Occ_O2_ph1        | 1          | Occ_O18_ph2  | 1       | Occ_O43_ph2       | 1         |
| X_O3_ph1          | 0.6045     | X_O19_ph2    | 0.40009 | X_O44_ph2         | 0.06452   |
| Y_O3_ph1          | 0.25       | Y_O19_ph2    | 0.12892 | Y_O44_ph2         | 0.14578   |
| Z_O3_ph1          | 0.4697     | Z_O19_ph2    | 0.1466  | Z_O44_ph2         | 0.12622   |
| Biso_O3_ph1       | 1.373      | Biso_O19_ph2 | 1.871   | Biso_O44_ph2      | 1.713     |
| Occ_O3_ph1        | 1          | Occ_O19_ph2  | 1       | Occ_O44_ph2       | 1         |
| X_O4_ph1          | 0.25       | X_O20_ph2    | 0.47258 | X_O45_ph2         | 0.4973    |
| Y_O4_ph1          | 0.75       | Y_O20_ph2    | 0.15725 | Y_O45_ph2         | 0.155     |
| Z_O4_ph1          | 0.0008     | Z_O20_ph2    | 0.07648 | Z_O45_ph2         | 0.1807    |
| Biso_O4_ph1       | 1.002      | Biso_O20_ph2 | 1.555   | Biso_O45_ph2      | 2.423     |
| Occ_O4_ph1        | 1          | Occ_O20_ph2  | 1       | Occ_O45_ph2       | 1         |
| Bover_ph2_pat1    | 0          | X_O21_ph2    | 0.49048 | X_O46_ph2         | 0.5101    |
| Strain1_ph2_pat1  | 0          | Y_O21_ph2    | 0.39627 | Y_O46_ph2         | 0.492     |
| Strain2_ph2_pat1  | 0          | Z_O21_ph2    | 0.12804 | Z_O46_ph2         | 0.1707    |
| Strain3_ph2_pat1  | 0          | Biso_O21_ph2 | 1.618   | Biso_O46_ph2      | 2.55      |
| G-Size_ph2_pat1   | 0          | Occ_O21_ph2  | 1       | Occ_O46_ph2       | 1         |
| L-Size_ph2_pat1   | 0          | X_O22_ph2    | 0.4726  | X_O47_ph2         | 0.3362    |
| Y-cos_ph2_pat1    | 0          | Y_O22_ph2    | 0.48128 | Y_O47_ph2         | 0.3271    |
| EtaRght0_ph2_pat1 | 0          | Z_O22_ph2    | 0.07129 | Z_O47_ph2         | 0.173     |
| X-tan_ph2_pat1    | 0.0216357  | Biso_O22_ph2 | 1.823   | Biso_O47_ph2      | 2.866     |
| U-Cagl_ph2_pat1   | 0          | Occ_O22_ph2  | 1       | Occ_O47_ph2       | 1         |
| V-Cagl_ph2_pat1   | 0          | X_O23_ph2    | 0.41032 | X_O48_ph2         | 0.3357    |
| W-Cagl_ph2_pat1   | 0.00850576 | Y_O23_ph2    | 0.45904 | Y_O48_ph2         | 0.1759    |
| EtaPV_ph2_pat1    | 0.0645069  | Z_O23_ph2    | 0.15181 | Z_O48_ph2         | 0.0004    |
| Cell_A_ph2_pat1   | 26.3227    | Biso_O23_ph2 | 1.594   | Biso_O48_ph2      | 2.645     |
| Cell_B_ph2_pat1   | 26.3227    | Occ_O23_ph2  | 1       | Occ_O48_ph2       | 1         |
| Cell_C_ph2_pat1   | 26.3227    | X_O24_ph2    | 0.3524  | X_O49_ph2         | 0.16284   |
| Cell_D_ph2_pat1   | 90         | Y_O24_ph2    | 0.3083  | Y_O49_ph2         | 0.16284   |
| Cell_E_ph2_pat1   | 90         | Z_O24_ph2    | 0.06917 | Z_O49_ph2         | 0.16284   |
| Cell_F_ph2_pat1   | 90         | Biso_O24_ph2 | 2.044   | Biso_O49_ph2      | 2.842     |
| Or1_ph2_pat1      | 0          | Occ_O24_ph2  | 1       | Occ_O49_ph2       | 1         |
| Or2_ph2_pat1      | 0          | X_O25_ph2    | 0.3565  | X_O50_ph2         | 0.5       |
| Asym1_ph2_pat1    | 0.0707913  | Y_O25_ph2    | 0.22994 | Y_O50_ph2         | 0.5       |
| Asym2_ph2_pat1    | 0          | Z_O25_ph2    | 0.1359  | Z_O50_ph2         | 0.5       |
| Asym3_ph2_pat1    | 0          | Biso_O25_ph2 | 2.218   | Biso_O50_ph2      | 2.85      |
| Asym4_ph2_pat1    | 0          | Occ_O25_ph2  | 1       | Occ_O50_ph2       | 1         |
| X_Zr1_ph2         | 0.497434   | X_O26_ph2    | 0.43193 | Bover_ph3_pat1    | 0         |
| Y_Zr1_ph2         | -0.001114  | Y_O26_ph2    | 0.3013  | Strain1_ph3_pat1  | 0         |
| Z_Zr1_ph2         | 0.165602   | Z_O26_ph2    | 0.13571 | Strain2_ph3_pat1  | 0         |
| Biso_Zr1_ph2      | 0.497      | Biso_O26_ph2 | 1.91    | Strain3_ph3_pat1  | 0         |
| Occ_Zr1_ph2       | 1          | Occ_O26_ph2  | 1       | G-Size_ph3_pat1   | 0         |
| X_Zr2_ph2         | 0.500084   | X_O27_ph2    | 0.23557 | L-Size_ph3_pat1   | 0         |
| Y_Zr2_ph2         | 0.32661    | Y_O27_ph2    | 0.3606  | Y-cos_ph3_pat1    | 0         |
| Z_Zr2_ph2         | 0.164329   | Z_O27_ph2    | 0.18436 | EtaRght0_ph3_pat1 | 0         |
| Biso_Zr2_ph2      | 0.481      | Biso_O27_ph2 | 1.879   | X-tan_ph3_pat1    | 0.0165867 |
| Occ_Zr2_ph2       | 1          | Occ_O27_ph2  | 1       | U-Cagl_ph3_pat1   | 0         |
| X_Zr3_ph2         | 0.496217   | X_O28_ph2    | 0.3133  | V-Cagl_ph3_pat1   | 0         |
| Y_Zr3_ph2         | 0.170143   | Y_O28_ph2    | 0.42848 | W-Cagl_ph3_pat1   | 0.322872  |

|              |          |              |          |                 |          |
|--------------|----------|--------------|----------|-----------------|----------|
| Z_Zr3_ph2    | 0.34384  | Z_O28_ph2    | 0.1951   | EtaPV_ph3_pat1  | 0.420966 |
| Biso_Zr3_ph2 | 0.426    | Biso_O28_ph2 | 2.029    | Cell_A_ph3_pat1 | 5.14452  |
| Occ_Zr3_ph2  | 1        | Occ_O28_ph2  | 1        | Cell_B_ph3_pat1 | 5.19371  |
| X_Zr4_ph2    | 0.331355 | X_O29_ph2    | 0.29834  | Cell_C_ph3_pat1 | 5.31993  |
| Y_Zr4_ph2    | 0.162024 | Y_O29_ph2    | 0.35604  | Cell_D_ph3_pat1 | 90       |
| Z_Zr4_ph2    | 0.166102 | Z_O29_ph2    | 0.26787  | Cell_E_ph3_pat1 | 98.8951  |
| Biso_Zr4_ph2 | 0.505    | Biso_O29_ph2 | 1.831    | Cell_F_ph3_pat1 | 90       |
| Occ_Zr4_ph2  | 1        | Occ_O29_ph2  | 1        | Or1_ph3_pat1    | 0        |
| X_Zr5_ph2    | 0.334645 | X_O30_ph2    | 0.3018   | Or2_ph3_pat1    | 0        |
| Y_Zr5_ph2    | 0.334645 | Y_O30_ph2    | 0.14271  | Asym1_ph3_pat1  | 0.002357 |
| Z_Zr5_ph2    | 0.334645 | Z_O30_ph2    | 0.09573  | Asym2_ph3_pat1  | 0        |
| Biso_Zr5_ph2 | 0.536    | Biso_O30_ph2 | 1.792    | Asym3_ph3_pat1  | 0        |
| Occ_Zr5_ph2  | 1        | Occ_O30_ph2  | 1        | Asym4_ph3_pat1  | 0        |
| X_Zr6_ph2    | 0        | X_O31_ph2    | 0.24174  | X_Zr1_ph3       | 0.2758   |
| Y_Zr6_ph2    | 0        | Y_O31_ph2    | 0.12759  | Y_Zr1_ph3       | 0.0411   |
| Z_Zr6_ph2    | 0        | Z_O31_ph2    | 0.01154  | Z_Zr1_ph3       | 0.2082   |
| Biso_Zr6_ph2 | 0.505    | Biso_O31_ph2 | 1.65     | Biso_Zr1_ph3    | 0.303    |
| Occ_Zr6_ph2  | 1        | Occ_O31_ph2  | 1        | Occ_Zr1_ph3     | 1        |
| X_V7_ph2     | 0.46207  | X_O32_ph2    | 0.32893  | X_O2_ph3        | 0.0703   |
| Y_V7_ph2     | 0.12653  | Y_O32_ph2    | 0.07216  | Y_O2_ph3        | 0.3359   |
| Z_V7_ph2     | 0.13145  | Z_O32_ph2    | 0.02455  | Z_O2_ph3        | 0.3406   |
| Biso_V7_ph2  | 0.781    | Biso_O32_ph2 | 1.689    | Biso_O2_ph3     | 0.316    |
| Occ_V7_ph2   | 1        | Occ_O32_ph2  | 1        | Occ_O2_ph3      | 1        |
| X_V8_ph2     | 0.4703   | X_O33_ph2    | 0.35597  | X_O3_ph3        | 0.4423   |
| Y_V8_ph2     | 0.45683  | Y_O33_ph2    | 0.27237  | Y_O3_ph3        | 0.7549   |
| Z_V8_ph2     | 0.12993  | Z_O33_ph2    | -0.03702 | Z_O3_ph3        | 0.4789   |
| Biso_V8_ph2  | 0.742    | Biso_O33_ph2 | 1.587    | Biso_O3_ph3     | 0.228    |
| Occ_V8_ph2   | 1        | Occ_O33_ph2  | 1        | Occ_O3_ph3      | 1        |
| X_V9_ph2     | 0.36952  | X_O34_ph2    | 0.43498  |                 |          |

Phase Analysis Report.  
Sample: solid-state 180' 20 h × 3

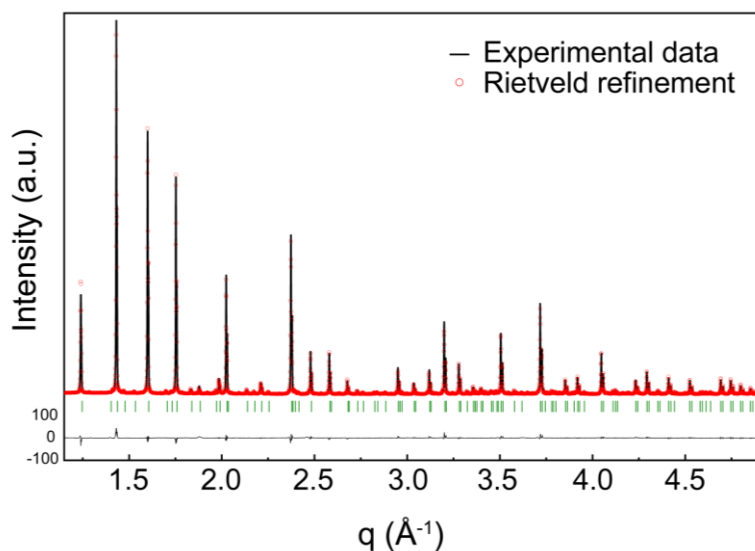

**Figure S3.** Rietveld refinement plot, showing the observed (black), calculated (red) and difference patterns of  $ZrV_2O_7$  solid-state 180' 20 h × 3 sample. Vertical lines indicate the positions of the Bragg reflections.

**Sample and refinement data**

|                                                            |                              |
|------------------------------------------------------------|------------------------------|
| Data range                                                 | 15.552° - 75.029° 2 $\theta$ |
| Original data range                                        | 5.000° - 99.985°             |
| Step size                                                  | 0.010                        |
| Rietveld refinement converged                              | Yes                          |
| $\alpha_2$ subtracted                                      | No                           |
| Background subtracted                                      | No                           |
| Data smoothed                                              | No                           |
| Specimen displacement correction (Bragg-Brentano geometry) | $T = (-s/R) = 0.00023286$    |
| Radiation                                                  | X-rays                       |
| Method                                                     | Rietveld refinement          |
| Automatic refinement                                       | No                           |
| Final weighted average Bragg R factor                      | 5.6                          |
| Final reduced $\chi^2$                                     | 14.7                         |

**Matched phases**

| Amount (%) | Name                   | Formula sum | COD ID  |
|------------|------------------------|-------------|---------|
| 95.5       |                        | O7 V2 Zr    | 2002983 |
| 4.5        | Baddeleyite            | O2 Zr       | 9007485 |
| 3.6        | Unidentified peak area |             |         |

### Parameter List for Refinement

| Parameter             | Final value     | Parameter        | Final value | Parameter    | Final value |
|-----------------------|-----------------|------------------|-------------|--------------|-------------|
| SyCos_pat1            | 0.0266838       | Biso_V14_ph1     | 0.726       | Biso_O36_ph1 | 1.744       |
| Bck_0_pat1            | 0.999296        | Occ_V14_ph1      | 1           | Occ_O36_ph1  | 1           |
| Scale_ph1_pat1        | 1.74401E-06     | X_V15_ph1        | 0.2014<br>7 | X_O37_ph1    | 0.51715     |
| Cell_A_ph1_pat1       | 26.3254         | Y_V15_ph1        | 0.2014<br>7 | Y_O37_ph1    | 0.59745     |
| Scale_ph2_pat1        | 0.00070988<br>2 | Z_V15_ph1        | 0.2014<br>7 | Z_O37_ph1    | 0.18395     |
| Cell_A_ph2_pat1       | 5.14671         | Biso_V15_ph1     | 0.813       | Biso_O37_ph1 | 1.871       |
| Cell_B_ph2_pat1       | 5.20834         | Occ_V15_ph1      | 1           | Occ_O37_ph1  | 1           |
| Cell_C_ph2_pat1       | 5.31561         | X_V16_ph1        | 0.5383<br>4 | X_O38_ph1    | 0.60074     |
| Cell_E_ph2_pat1       | 99.201          | Y_V16_ph1        | 0.5383<br>4 | Y_O38_ph1    | 0.53739     |
| Zero_pat1             | 0               | Z_V16_ph1        | 0.5383<br>4 | Z_O38_ph1    | 0.20051     |
| SySin_pat1            | 0               | Biso_V16_ph1     | 0.686       | Biso_O38_ph1 | 1.808       |
| Lambda_pat1           | 1.54187         | Occ_V16_ph1      | 1           | Occ_O38_ph1  | 1           |
| PO_mabs_pat1          | 0               | X_V17_ph1        | 0.1245<br>9 | X_O39_ph1    | 0.51072     |
| Cp_mabs_pat1          | 0               | Y_V17_ph1        | 0.1245<br>9 | Y_O39_ph1    | 0.25854     |
| Tau_mabs_pat1         | 0.1             | Z_V17_ph1        | 0.1245<br>9 | Z_O39_ph1    | 0.20207     |
| Bck_1_pat1            | 0               | Biso_V17_ph1     | 0.734       | Biso_O39_ph1 | 1.823       |
| Bck_2_pat1            | 0               | Occ_V17_ph1      | 1           | Occ_O39_ph1  | 1           |
| Bck_3_pat1            | 0               | X_O18_ph1        | 0.4800<br>4 | X_O40_ph1    | 0.59407     |
| Bover_ph1_pat1        | 0               | Y_O18_ph1        | 0.0653<br>9 | Y_O40_ph1    | 0.19718     |
| Strain1_ph1_pat1      | 0               | Z_O18_ph1        | 0.1262      | Z_O40_ph1    | 0.19242     |
| Strain2_ph1_pat1      | 0               | Biso_O18_ph<br>1 | 1.523       | Biso_O40_ph1 | 1.808       |
| Strain3_ph1_pat1      | 0               | Occ_O18_ph1      | 1           | Occ_O40_ph1  | 1           |
| G-Size_ph1_pat1       | 0               | X_O19_ph1        | 0.4000<br>9 | X_O41_ph1    | 0.5323      |
| L-Size_ph1_pat1       | 0               | Y_O19_ph1        | 0.1289<br>2 | Y_O41_ph1    | 0.18804     |
| Y-cos_ph1_pat1        | 0               | Z_O19_ph1        | 0.1466      | Z_O41_ph1    | 0.2758      |
| EtaRght0_ph1_pat<br>1 | 0               | Biso_O19_ph<br>1 | 1.871       | Biso_O41_ph1 | 1.847       |
| X-tan_ph1_pat1        | 0.00773469      | Occ_O19_ph1      | 1           | Occ_O41_ph1  | 1           |
| U-Cagl_ph1_pat1       | 0               | X_O20_ph1        | 0.4725<br>8 | X_O42_ph1    | 0.26222     |
| V-Cagl_ph1_pat1       | 0               | Y_O20_ph1        | 0.1572<br>5 | Y_O42_ph1    | 0.1951      |
| W-Cagl_ph1_pat1       | 0.0021958       | Z_O20_ph1        | 0.0764<br>8 | Z_O42_ph1    | 0.18376     |

|                 |           |              |         |              |          |
|-----------------|-----------|--------------|---------|--------------|----------|
| EtaPV_ph1_pat1  | 0.304948  | Biso_O20_ph1 | 1.555   | Biso_O42_ph1 | 1.958    |
| Cell_B_ph1_pat1 | 26.3254   | Occ_O20_ph1  | 1       | Occ_O42_ph1  | 1        |
| Cell_C_ph1_pat1 | 26.3254   | X_O21_ph1    | 0.49048 | X_O43_ph1    | 0.59815  |
| Cell_D_ph1_pat1 | 90        | Y_O21_ph1    | 0.39627 | Y_O43_ph1    | -0.01624 |
| Cell_E_ph1_pat1 | 90        | Z_O21_ph1    | 0.12804 | Z_O43_ph1    | 0.03707  |
| Cell_F_ph1_pat1 | 90        | Biso_O21_ph1 | 1.618   | Biso_O43_ph1 | 1.531    |
| Or1_ph1_pat1    | 0         | Occ_O21_ph1  | 1       | Occ_O43_ph1  | 1        |
| Or2_ph1_pat1    | 0         | X_O22_ph1    | 0.4726  | X_O44_ph1    | 0.06452  |
| Asym1_ph1_pat1  | 0         | Y_O22_ph1    | 0.48128 | Y_O44_ph1    | 0.14578  |
| Asym2_ph1_pat1  | 0.0281335 | Z_O22_ph1    | 0.07129 | Z_O44_ph1    | 0.12622  |
| Asym3_ph1_pat1  | 0         | Biso_O22_ph1 | 1.823   | Biso_O44_ph1 | 1.713    |
| Asym4_ph1_pat1  | 0         | Occ_O22_ph1  | 1       | Occ_O44_ph1  | 1        |
| X_Zr1_ph1       | 0.497434  | X_O23_ph1    | 0.41032 | X_O45_ph1    | 0.4973   |
| Y_Zr1_ph1       | -0.001114 | Y_O23_ph1    | 0.45904 | Y_O45_ph1    | 0.155    |
| Z_Zr1_ph1       | 0.165602  | Z_O23_ph1    | 0.15181 | Z_O45_ph1    | 0.1807   |
| Biso_Zr1_ph1    | 1.39768   | Biso_O23_ph1 | 1.594   | Biso_O45_ph1 | 2.423    |
| Occ_Zr1_ph1     | 1         | Occ_O23_ph1  | 1       | Occ_O45_ph1  | 1        |
| X_Zr2_ph1       | 0.50008   | X_O24_ph1    | 0.3524  | X_O46_ph1    | 0.5101   |
| Y_Zr2_ph1       | 0.32661   | Y_O24_ph1    | 0.3083  | Y_O46_ph1    | 0.492    |
| Z_Zr2_ph1       | 0.164329  | Z_O24_ph1    | 0.06917 | Z_O46_ph1    | 0.1707   |
| Biso_Zr2_ph1    | 1.68529   | Biso_O24_ph1 | 2.044   | Biso_O46_ph1 | 2.55     |
| Occ_Zr2_ph1     | 1         | Occ_O24_ph1  | 1       | Occ_O46_ph1  | 1        |
| X_Zr3_ph1       | 0.496217  | X_O25_ph1    | 0.3565  | X_O47_ph1    | 0.3362   |
| Y_Zr3_ph1       | 0.170143  | Y_O25_ph1    | 0.22994 | Y_O47_ph1    | 0.3271   |
| Z_Zr3_ph1       | 0.34384   | Z_O25_ph1    | 0.1359  | Z_O47_ph1    | 0.173    |
| Biso_Zr3_ph1    | 1.0166    | Biso_O25_ph1 | 2.218   | Biso_O47_ph1 | 2.866    |
| Occ_Zr3_ph1     | 1         | Occ_O25_ph1  | 1       | Occ_O47_ph1  | 1        |
| X_Zr4_ph1       | 0.331355  | X_O26_ph1    | 0.43193 | X_O48_ph1    | 0.3357   |
| Y_Zr4_ph1       | 0.162024  | Y_O26_ph1    | 0.3013  | Y_O48_ph1    | 0.1759   |
| Z_Zr4_ph1       | 0.1661    | Z_O26_ph1    | 0.13571 | Z_O48_ph1    | 0.0004   |
| Biso_Zr4_ph1    | 0.38058   | Biso_O26_ph1 | 1.91    | Biso_O48_ph1 | 2.645    |
| Occ_Zr4_ph1     | 1         | Occ_O26_ph1  | 1       | Occ_O48_ph1  | 1        |

|              |          |                  |             |                        |                |
|--------------|----------|------------------|-------------|------------------------|----------------|
| X_Zr5_ph1    | 0.334645 | X_O27_ph1        | 0.2355<br>7 | X_O49_ph1              | 0.16284        |
| Y_Zr5_ph1    | 0.334645 | Y_O27_ph1        | 0.3606      | Y_O49_ph1              | 0.16284        |
| Z_Zr5_ph1    | 0.334645 | Z_O27_ph1        | 0.1843<br>6 | Z_O49_ph1              | 0.16284        |
| Biso_Zr5_ph1 | 0.50051  | Biso_O27_ph<br>1 | 1.879       | Biso_O49_ph1           | 2.842          |
| Occ_Zr5_ph1  | 1        | Occ_O27_ph1      | 1           | Occ_O49_ph1            | 1              |
| X_Zr6_ph1    | 0        | X_O28_ph1        | 0.3133      | X_O50_ph1              | 0.5            |
| Y_Zr6_ph1    | 0        | Y_O28_ph1        | 0.4284<br>8 | Y_O50_ph1              | 0.5            |
| Z_Zr6_ph1    | 0        | Z_O28_ph1        | 0.1951      | Z_O50_ph1              | 0.5            |
| Biso_Zr6_ph1 | 0.081808 | Biso_O28_ph<br>1 | 2.029       | Biso_O50_ph1           | 2.85           |
| Occ_Zr6_ph1  | 1        | Occ_O28_ph1      | 1           | Occ_O50_ph1            | 1              |
| X_V7_ph1     | 0.46207  | X_O29_ph1        | 0.2983<br>4 | Bover_ph2_pat1         | 0              |
| Y_V7_ph1     | 0.12653  | Y_O29_ph1        | 0.3560<br>4 | Strain1_ph2_pat1       | 0              |
| Z_V7_ph1     | 0.13145  | Z_O29_ph1        | 0.2678<br>7 | Strain2_ph2_pat1       | 0              |
| Biso_V7_ph1  | 0.781    | Biso_O29_ph<br>1 | 1.831       | Strain3_ph2_pat1       | 0              |
| Occ_V7_ph1   | 1        | Occ_O29_ph1      | 1           | G-Size_ph2_pat1        | 0              |
| X_V8_ph1     | 0.4703   | X_O30_ph1        | 0.3018      | L-Size_ph2_pat1        | 0              |
| Y_V8_ph1     | 0.45683  | Y_O30_ph1        | 0.1427<br>1 | Y-cos_ph2_pat1         | 0              |
| Z_V8_ph1     | 0.12993  | Z_O30_ph1        | 0.0957<br>3 | EtaRight0_ph2_pat<br>1 | 0              |
| Biso_V8_ph1  | 0.742    | Biso_O30_ph<br>1 | 1.792       | X-tan_ph2_pat1         | 0.014973       |
| Occ_V8_ph1   | 1        | Occ_O30_ph1      | 1           | U-Cagl_ph2_pat1        | 0              |
| X_V9_ph1     | 0.36952  | X_O31_ph1        | 0.2417<br>4 | V-Cagl_ph2_pat1        | 0              |
| Y_V9_ph1     | 0.29152  | Y_O31_ph1        | 0.1275<br>9 | W-Cagl_ph2_pat1        | 0.0052784<br>6 |
| Z_V9_ph1     | 0.12774  | Z_O31_ph1        | 0.0115<br>4 | EtaPV_ph2_pat1         | 0.235389       |
| Biso_V9_ph1  | 0.742    | Biso_O31_ph<br>1 | 1.65        | Cell_D_ph2_pat1        | 90             |
| Occ_V9_ph1   | 1        | Occ_O31_ph1      | 1           | Cell_F_ph2_pat1        | 90             |
| X_V10_ph1    | 0.29521  | X_O32_ph1        | 0.3289<br>3 | Or1_ph2_pat1           | 0              |
| Y_V10_ph1    | 0.36857  | Y_O32_ph1        | 0.0721<br>6 | Or2_ph2_pat1           | 0              |
| Z_V10_ph1    | 0.20539  | Z_O32_ph1        | 0.0245<br>5 | Asym1_ph2_pat1         | 0              |
| Biso_V10_ph1 | 0.757    | Biso_O32_ph<br>1 | 1.689       | Asym2_ph2_pat1         | 0              |
| Occ_V10_ph1  | 1        | Occ_O32_ph1      | 1           | Asym3_ph2_pat1         | 0              |

|              |         |                  |                  |                |        |
|--------------|---------|------------------|------------------|----------------|--------|
| X_V11_ph1    | 0.30164 | X_O33_ph1        | 0.3559<br>7      | Asym4_ph2_pat1 | 0      |
| Y_V11_ph1    | 0.12878 | Y_O33_ph1        | 0.2723<br>7      | X_Zr1_ph2      | 0.2758 |
| Z_V11_ph1    | 0.03361 | Z_O33_ph1        | -<br>0.0370<br>2 | Y_Zr1_ph2      | 0.0411 |
| Biso_V11_ph1 | 0.679   | Biso_O33_ph<br>1 | 1.587            | Z_Zr1_ph2      | 0.2082 |
| Occ_V11_ph1  | 1       | Occ_O33_ph1      | 1                | Biso_Zr1_ph2   | 0.303  |
| X_V12_ph1    | 0.37478 | X_O34_ph1        | 0.4349<br>8      | Occ_Zr1_ph2    | 1      |
| Y_V12_ph1    | 0.21139 | Y_O34_ph1        | 0.2065<br>3      | X_O2_ph2       | 0.0703 |
| Z_V12_ph1    | -0.0395 | Z_O34_ph1        | -<br>0.0185<br>1 | Y_O2_ph2       | 0.3359 |
| Biso_V12_ph1 | 0.765   | Biso_O34_ph<br>1 | 1.721            | Z_O2_ph2       | 0.3406 |
| Occ_V12_ph1  | 1       | Occ_O34_ph1      | 1                | Biso_O2_ph2    | 0.316  |
| X_V13_ph1    | 0.53727 | X_O35_ph1        | 0.3701<br>5      | Occ_O2_ph2     | 1      |
| Y_V13_ph1    | 0.54143 | Y_O35_ph1        | 0.1893<br>1      | X_O3_ph2       | 0.4423 |
| Z_V13_ph1    | 0.20594 | Z_O35_ph1        | -<br>0.0993<br>4 | Y_O3_ph2       | 0.7549 |
| Biso_V13_ph1 | 0.757   | Biso_O35_ph<br>1 | 1.808            | Z_O3_ph2       | 0.4789 |
| Occ_V13_ph1  | 1       | Occ_O35_ph1      | 1                | Biso_O3_ph2    | 0.228  |
| X_V14_ph1    | 0.53403 | X_O36_ph1        | 0.5206           | Occ_O3_ph2     | 1      |
| Y_V14_ph1    | 0.20035 | Y_O36_ph1        | 0.5350<br>8      |                |        |
| Z_V14_ph1    | 0.21313 | Z_O36_ph1        | 0.2673<br>4      |                |        |



Phase Analysis Report.  
 Sample: solid-state 40' 5 h N<sub>2</sub>-quenched

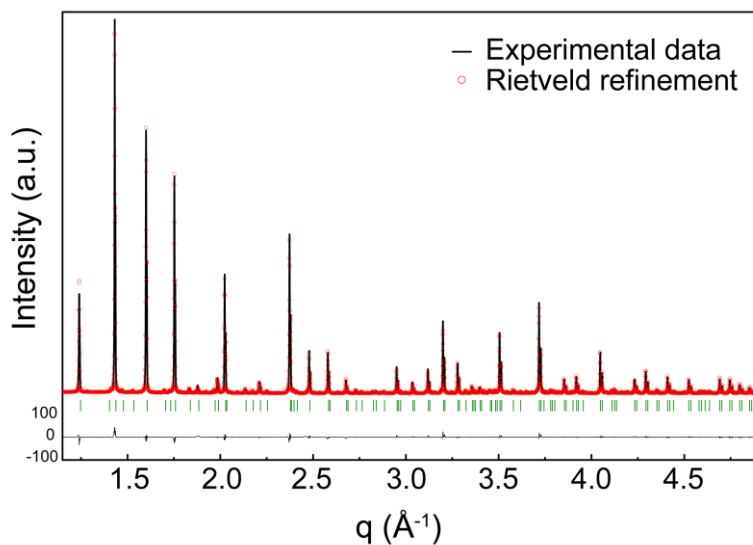

**Figure S4.** Rietveld refinement plot, showing the observed (black), calculated (red) and difference patterns of ZrV<sub>2</sub>O<sub>7</sub> solid-state 40' 5 h N<sub>2</sub>-quenched sample. Vertical lines indicate the positions of the Bragg reflections.

**Sample and refinement data**

|                                                            |                              |
|------------------------------------------------------------|------------------------------|
| Data range                                                 | 14.627° - 74.319° 2 $\theta$ |
| Original data range                                        | 5.000° - 99.985°             |
| Step size                                                  | 0.010                        |
| Rietveld refinement converged                              | Yes                          |
| $\alpha_2$ subtracted                                      | No                           |
| Background subtracted                                      | No                           |
| Data smoothed                                              | No                           |
| Specimen displacement correction (Bragg-Brentano geometry) | $T = (-s/R) = 0.0010909$     |
| Radiation                                                  | X-rays                       |
| Method                                                     | Rietveld refinement          |
| Automatic refinement                                       | No                           |
| Final weighted average Bragg R factor                      | 6.1                          |
| Final reduced $\chi^2$                                     | 13.3                         |

**Matched phases**

| Amount (%) | Name                   | Formula sum | COD ID  |
|------------|------------------------|-------------|---------|
| 76.4       |                        | O7 V2 Zr    | 2002983 |
| 13.4       | Shcherbinaite          | O5 V2       | 9012221 |
| 10.2       | Baddeleyite            | O2 Zr       | 9007485 |
| 4.4        | Unidentified peak area |             |         |

### Parameter List for Refinement

| Parameter         | Final value | Parameter    | Final value | Parameter    | Final value |
|-------------------|-------------|--------------|-------------|--------------|-------------|
| SyCos_pat1        | 0.125007    | Occ_V16_ph1  | 1           | Occ_O41_ph1  | 1           |
| Bck_2_pat1        | 0.0145723   | X_V17_ph1    | 0.12459     | X_O42_ph1    | 0.26222     |
| Scale_ph1_pat1    | 9.87702E-07 | Y_V17_ph1    | 0.12459     | Y_O42_ph1    | 0.1951      |
| Cell_A_ph1_pat1   | 26.3199     | Z_V17_ph1    | 0.12459     | Z_O42_ph1    | 0.18376     |
| Asym2_ph1_pat1    | 0.0184983   | Biso_V17_ph1 | 0.734       | Biso_O42_ph1 | 1.958       |
| Scale_ph2_pat1    | 0.00160114  | Occ_V17_ph1  | 1           | Occ_O42_ph1  | 1           |
| Cell_A_ph2_pat1   | 11.5078     | X_O18_ph1    | 0.48004     | X_O43_ph1    | 0.59815     |
| Cell_B_ph2_pat1   | 3.55543     | Y_O18_ph1    | 0.06539     | Y_O43_ph1    | -0.01624    |
| Cell_C_ph2_pat1   | 4.37343     | Z_O18_ph1    | 0.1262      | Z_O43_ph1    | 0.03707     |
| Scale_ph3_pat1    | 0.00114248  | Biso_O18_ph1 | 1.523       | Biso_O43_ph1 | 1.531       |
| Cell_A_ph3_pat1   | 5.14906     | Occ_O18_ph1  | 1           | Occ_O43_ph1  | 1           |
| Cell_B_ph3_pat1   | 5.20791     | X_O19_ph1    | 0.40009     | X_O44_ph1    | 0.06452     |
| Cell_C_ph3_pat1   | 5.31993     | Y_O19_ph1    | 0.12892     | Y_O44_ph1    | 0.14578     |
| Cell_E_ph3_pat1   | 99.2095     | Z_O19_ph1    | 0.1466      | Z_O44_ph1    | 0.12622     |
| Zero_pat1         | 0           | Biso_O19_ph1 | 1.871       | Biso_O44_ph1 | 1.713       |
| SySin_pat1        | 0           | Occ_O19_ph1  | 1           | Occ_O44_ph1  | 1           |
| Lambda_pat1       | 1.54187     | X_O20_ph1    | 0.47258     | X_O45_ph1    | 0.4973      |
| PO_mabs_pat1      | 0           | Y_O20_ph1    | 0.15725     | Y_O45_ph1    | 0.155       |
| Cp_mabs_pat1      | 0           | Z_O20_ph1    | 0.07648     | Z_O45_ph1    | 0.1807      |
| Tau_mabs_pat1     | 0.1         | Biso_O20_ph1 | 1.555       | Biso_O45_ph1 | 2.423       |
| Bck_0_pat1        | 1.00414     | Occ_O20_ph1  | 1           | Occ_O45_ph1  | 1           |
| Bck_1_pat1        | -16.0878    | X_O21_ph1    | 0.49048     | X_O46_ph1    | 0.5101      |
| Bck_3_pat1        | 0           | Y_O21_ph1    | 0.39627     | Y_O46_ph1    | 0.492       |
| Bover_ph1_pat1    | 0           | Z_O21_ph1    | 0.12804     | Z_O46_ph1    | 0.1707      |
| Strain1_ph1_pat1  | 0           | Biso_O21_ph1 | 1.618       | Biso_O46_ph1 | 2.55        |
| Strain2_ph1_pat1  | 0           | Occ_O21_ph1  | 1           | Occ_O46_ph1  | 1           |
| Strain3_ph1_pat1  | 0           | X_O22_ph1    | 0.4726      | X_O47_ph1    | 0.3362      |
| G-Size_ph1_pat1   | 0           | Y_O22_ph1    | 0.48128     | Y_O47_ph1    | 0.3271      |
| L-Size_ph1_pat1   | 0           | Z_O22_ph1    | 0.07129     | Z_O47_ph1    | 0.173       |
| Y-cos_ph1_pat1    | 0           | Biso_O22_ph1 | 1.823       | Biso_O47_ph1 | 2.866       |
| EtaRght0_ph1_pat1 | 0           | Occ_O22_ph1  | 1           | Occ_O47_ph1  | 1           |
| X-tan_ph1_pat1    | 0.0183281   | X_O23_ph1    | 0.41032     | X_O48_ph1    | 0.3357      |
| U-Cagl_ph1_pat1   | 0           | Y_O23_ph1    | 0.45904     | Y_O48_ph1    | 0.1759      |
| V-Cagl_ph1_pat1   | 0           | Z_O23_ph1    | 0.15181     | Z_O48_ph1    | 0.0004      |
| W-Cagl_ph1_pat1   | 0.00499782  | Biso_O23_ph1 | 1.594       | Biso_O48_ph1 | 2.645       |
| EtaPV_ph1_pat1    | 0.142145    | Occ_O23_ph1  | 1           | Occ_O48_ph1  | 1           |
| Cell_B_ph1_pat1   | 26.3199     | X_O24_ph1    | 0.3524      | X_O49_ph1    | 0.16284     |
| Cell_C_ph1_pat1   | 26.3199     | Y_O24_ph1    | 0.3083      | Y_O49_ph1    | 0.16284     |
| Cell_D_ph1_pat1   | 90          | Z_O24_ph1    | 0.06917     | Z_O49_ph1    | 0.16284     |
| Cell_E_ph1_pat1   | 90          | Biso_O24_ph1 | 2.044       | Biso_O49_ph1 | 2.842       |
| Cell_F_ph1_pat1   | 90          | Occ_O24_ph1  | 1           | Occ_O49_ph1  | 1           |
| Or1_ph1_pat1      | 0           | X_O25_ph1    | 0.3565      | X_O50_ph1    | 0.5         |
| Or2_ph1_pat1      | 0           | Y_O25_ph1    | 0.22994     | Y_O50_ph1    | 0.5         |
| Asym1_ph1_pat1    | 0           | Z_O25_ph1    | 0.1359      | Z_O50_ph1    | 0.5         |
| Asym3_ph1_pat1    | 0           | Biso_O25_ph1 | 2.218       | Biso_O50_ph1 | 2.85        |
| Asym4_ph1_pat1    | 0           | Occ_O25_ph1  | 1           | Occ_O50_ph1  | 1           |

|              |           |              |              |                   |           |
|--------------|-----------|--------------|--------------|-------------------|-----------|
| X_Zr1_ph1    | 0.497434  | X_O26_ph1    | 0.43193      | Bover_ph2_pat1    | 0         |
| Y_Zr1_ph1    | -0.001114 | Y_O26_ph1    | 0.3013       | Strain1_ph2_pat1  | 0         |
| Z_Zr1_ph1    | 0.165602  | Z_O26_ph1    | 0.13571      | Strain2_ph2_pat1  | 0         |
| Biso_Zr1_ph1 | 0.497     | Biso_O26_ph1 | 1.91         | Strain3_ph2_pat1  | 0         |
| Occ_Zr1_ph1  | 1         | Occ_O26_ph1  | 1            | G-Size_ph2_pat1   | 0         |
| X_Zr2_ph1    | 0.500084  | X_O27_ph1    | 0.23557      | L-Size_ph2_pat1   | 0         |
| Y_Zr2_ph1    | 0.32661   | Y_O27_ph1    | 0.3606       | Y-cos_ph2_pat1    | 0         |
| Z_Zr2_ph1    | 0.164329  | Z_O27_ph1    | 0.18436      | EtaRght0_ph2_pat1 | 0         |
| Biso_Zr2_ph1 | 0.481     | Biso_O27_ph1 | 1.879        | X-tan_ph2_pat1    | 0.0296979 |
| Occ_Zr2_ph1  | 1         | Occ_O27_ph1  | 1            | U-Cagl_ph2_pat1   | 0         |
| X_Zr3_ph1    | 0.496217  | X_O28_ph1    | 0.3133       | V-Cagl_ph2_pat1   | 0         |
| Y_Zr3_ph1    | 0.170143  | Y_O28_ph1    | 0.42848      | W-Cagl_ph2_pat1   | 0.0179067 |
| Z_Zr3_ph1    | 0.34384   | Z_O28_ph1    | 0.1951       | EtaPV_ph2_pat1    | 0.142823  |
| Biso_Zr3_ph1 | 0.426     | Biso_O28_ph1 | 2.029        | Cell_D_ph2_pat1   | 90        |
| Occ_Zr3_ph1  | 1         | Occ_O28_ph1  | 1            | Cell_E_ph2_pat1   | 90        |
| X_Zr4_ph1    | 0.331355  | X_O29_ph1    | 0.29834      | Cell_F_ph2_pat1   | 90        |
| Y_Zr4_ph1    | 0.162024  | Y_O29_ph1    | 0.35604      | Or1_ph2_pat1      | 0         |
| Z_Zr4_ph1    | 0.166102  | Z_O29_ph1    | 0.26787      | Or2_ph2_pat1      | 0         |
| Biso_Zr4_ph1 | 0.505     | Biso_O29_ph1 | 1.831        | Asym1_ph2_pat1    | 0.054126  |
| Occ_Zr4_ph1  | 1         | Occ_O29_ph1  | 1            | Asym2_ph2_pat1    | 0         |
| X_Zr5_ph1    | 0.334645  | X_O30_ph1    | 0.3018       | Asym3_ph2_pat1    | 0         |
| Y_Zr5_ph1    | 0.334645  | Y_O30_ph1    | 0.14271      | Asym4_ph2_pat1    | 0         |
| Z_Zr5_ph1    | 0.334645  | Z_O30_ph1    | 0.09573      | X_V1_ph2          | 0.60123   |
| Biso_Zr5_ph1 | 0.536     | Biso_O30_ph1 | 1.792        | Y_V1_ph2          | 0.25      |
| Occ_Zr5_ph1  | 1         | Occ_O30_ph1  | 1            | Z_V1_ph2          | 0.1086    |
| X_Zr6_ph1    | 0         | X_O31_ph1    | 0.24174      | Biso_V1_ph2       | 0.592     |
| Y_Zr6_ph1    | 0         | Y_O31_ph1    | 0.12759      | Occ_V1_ph2        | 1         |
| Z_Zr6_ph1    | 0         | Z_O31_ph1    | 0.01154      | X_O2_ph2          | 0.4309    |
| Biso_Zr6_ph1 | 0.505     | Biso_O31_ph1 | 1.65         | Y_O2_ph2          | 0.25      |
| Occ_Zr6_ph1  | 1         | Occ_O31_ph1  | 1            | Z_O2_ph2          | -0.0028   |
| X_V7_ph1     | 0.46207   | X_O32_ph1    | 0.32893      | Biso_O2_ph2       | 0.781     |
| Y_V7_ph1     | 0.12653   | Y_O32_ph1    | 0.07216      | Occ_O2_ph2        | 1         |
| Z_V7_ph1     | 0.13145   | Z_O32_ph1    | 0.02455      | X_O3_ph2          | 0.6045    |
| Biso_V7_ph1  | 0.781     | Biso_O32_ph1 | 1.689        | Y_O3_ph2          | 0.25      |
| Occ_V7_ph1   | 1         | Occ_O32_ph1  | 1            | Z_O3_ph2          | 0.4697    |
| X_V8_ph1     | 0.4703    | X_O33_ph1    | 0.35597      | Biso_O3_ph2       | 1.373     |
| Y_V8_ph1     | 0.45683   | Y_O33_ph1    | 0.27237      | Occ_O3_ph2        | 1         |
| Z_V8_ph1     | 0.12993   | Z_O33_ph1    | -<br>0.03702 | X_O4_ph2          | 0.25      |
| Biso_V8_ph1  | 0.742     | Biso_O33_ph1 | 1.587        | Y_O4_ph2          | 0.75      |
| Occ_V8_ph1   | 1         | Occ_O33_ph1  | 1            | Z_O4_ph2          | 0.0008    |
| X_V9_ph1     | 0.36952   | X_O34_ph1    | 0.43498      | Biso_O4_ph2       | 1.002     |
| Y_V9_ph1     | 0.29152   | Y_O34_ph1    | 0.20653      | Occ_O4_ph2        | 1         |
| Z_V9_ph1     | 0.12774   | Z_O34_ph1    | -<br>0.01851 | Bover_ph3_pat1    | 0         |
| Biso_V9_ph1  | 0.742     | Biso_O34_ph1 | 1.721        | Strain1_ph3_pat1  | 0         |
| Occ_V9_ph1   | 1         | Occ_O34_ph1  | 1            | Strain2_ph3_pat1  | 0         |
| X_V10_ph1    | 0.29521   | X_O35_ph1    | 0.37015      | Strain3_ph3_pat1  | 0         |
| Y_V10_ph1    | 0.36857   | Y_O35_ph1    | 0.18931      | G-Size_ph3_pat1   | 0         |

|              |         |              |              |                   |            |
|--------------|---------|--------------|--------------|-------------------|------------|
| Z_V10_ph1    | 0.20539 | Z_O35_ph1    | -<br>0.09934 | L-Size_ph3_pat1   | 0          |
| Biso_V10_ph1 | 0.757   | Biso_O35_ph1 | 1.808        | Y-cos_ph3_pat1    | 0          |
| Occ_V10_ph1  | 1       | Occ_O35_ph1  | 1            | EtaRght0_ph3_pat1 | 0          |
| X_V11_ph1    | 0.30164 | X_O36_ph1    | 0.5206       | X-tan_ph3_pat1    | 0.0118651  |
| Y_V11_ph1    | 0.12878 | Y_O36_ph1    | 0.53508      | U-Cagl_ph3_pat1   | 0          |
| Z_V11_ph1    | 0.03361 | Z_O36_ph1    | 0.26734      | V-Cagl_ph3_pat1   | 0          |
| Biso_V11_ph1 | 0.679   | Biso_O36_ph1 | 1.744        | W-Cagl_ph3_pat1   | 0.00898257 |
| Occ_V11_ph1  | 1       | Occ_O36_ph1  | 1            | EtaPV_ph3_pat1    | 0.28069    |
| X_V12_ph1    | 0.37478 | X_O37_ph1    | 0.51715      | Cell_D_ph3_pat1   | 90         |
| Y_V12_ph1    | 0.21139 | Y_O37_ph1    | 0.59745      | Cell_F_ph3_pat1   | 90         |
| Z_V12_ph1    | -0.0395 | Z_O37_ph1    | 0.18395      | Or1_ph3_pat1      | 0          |
| Biso_V12_ph1 | 0.765   | Biso_O37_ph1 | 1.871        | Or2_ph3_pat1      | 0          |
| Occ_V12_ph1  | 1       | Occ_O37_ph1  | 1            | Asym1_ph3_pat1    | 0          |
| X_V13_ph1    | 0.53727 | X_O38_ph1    | 0.60074      | Asym2_ph3_pat1    | 0          |
| Y_V13_ph1    | 0.54143 | Y_O38_ph1    | 0.53739      | Asym3_ph3_pat1    | 0          |
| Z_V13_ph1    | 0.20594 | Z_O38_ph1    | 0.20051      | Asym4_ph3_pat1    | 0          |
| Biso_V13_ph1 | 0.757   | Biso_O38_ph1 | 1.808        | X_Zr1_ph3         | 0.2758     |
| Occ_V13_ph1  | 1       | Occ_O38_ph1  | 1            | Y_Zr1_ph3         | 0.0411     |
| X_V14_ph1    | 0.53403 | X_O39_ph1    | 0.51072      | Z_Zr1_ph3         | 0.2082     |
| Y_V14_ph1    | 0.20035 | Y_O39_ph1    | 0.25854      | Biso_Zr1_ph3      | 0.303      |
| Z_V14_ph1    | 0.21313 | Z_O39_ph1    | 0.20207      | Occ_Zr1_ph3       | 1          |
| Biso_V14_ph1 | 0.726   | Biso_O39_ph1 | 1.823        | X_O2_ph3          | 0.0703     |
| Occ_V14_ph1  | 1       | Occ_O39_ph1  | 1            | Y_O2_ph3          | 0.3359     |
| X_V15_ph1    | 0.20147 | X_O40_ph1    | 0.59407      | Z_O2_ph3          | 0.3406     |
| Y_V15_ph1    | 0.20147 | Y_O40_ph1    | 0.19718      | Biso_O2_ph3       | 0.316      |
| Z_V15_ph1    | 0.20147 | Z_O40_ph1    | 0.19242      | Occ_O2_ph3        | 1          |
| Biso_V15_ph1 | 0.813   | Biso_O40_ph1 | 1.808        | X_O3_ph3          | 0.4423     |
| Occ_V15_ph1  | 1       | Occ_O40_ph1  | 1            | Y_O3_ph3          | 0.7549     |
| X_V16_ph1    | 0.53834 | X_O41_ph1    | 0.5323       | Z_O3_ph3          | 0.4789     |
| Y_V16_ph1    | 0.53834 | Y_O41_ph1    | 0.18804      | Biso_O3_ph3       | 0.228      |
| Z_V16_ph1    | 0.53834 | Z_O41_ph1    | 0.2758       | Occ_O3_ph3        | 1          |
| Biso_V16_ph1 | 0.686   | Biso_O41_ph1 | 1.847        |                   |            |

Phase Analysis Report.  
Sample: solvothermal

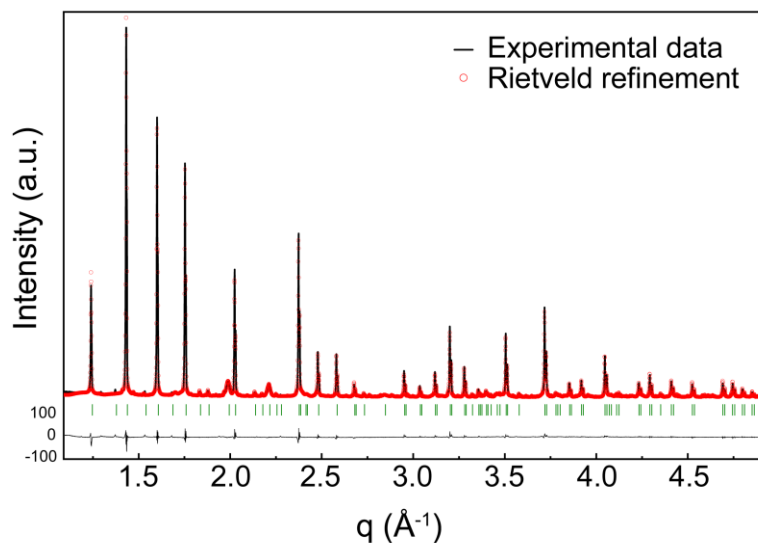

**Figure S5.** Rietveld refinement plot, showing the observed (black), calculated (red) and difference patterns of  $ZrV_2O_7$  solvothermal reaction sample. Vertical lines indicate the positions of the Bragg reflections.

**Sample and refinement data**

|                                                            |                              |
|------------------------------------------------------------|------------------------------|
| Data range                                                 | 15.415° - 74.141° 2 $\theta$ |
| Original data range                                        | 5.000° - 99.985°             |
| Step size                                                  | 0.010                        |
| Rietveld refinement converged                              | Yes                          |
| $\alpha_2$ subtracted                                      | No                           |
| Background subtracted                                      | No                           |
| Data smoothed                                              | No                           |
| Specimen displacement correction (Bragg-Brentano geometry) | $T = (-s/R) = 0.00044662$    |
| Radiation                                                  | X-rays                       |
| Method                                                     | Rietveld refinement          |
| Automatic refinement                                       | No                           |
| Final weighted average Bragg R factor                      | 8.0                          |
| Final reduced $\chi^2$                                     | 17.2                         |

**Matched phases**

| Amount (%) | Name                   | Formula sum | COD ID  |
|------------|------------------------|-------------|---------|
| 90.4       |                        | O7 V2 Zr    | 2002983 |
| 9.6        | Baddeleyite            | O2 Zr       | 9007485 |
| 4.6        | Unidentified peak area |             |         |

### Parameter List for Refinement

| Parameter         | Final value | Parameter    | Final value | Parameter    | Final value |
|-------------------|-------------|--------------|-------------|--------------|-------------|
| SyCos_pat1        | 0.0511788   | Z_V14_ph1    | 0.21313     | Y_O36_ph1    | 0.53508     |
| Bck_1_pat1        | -1.51723    | Biso_V14_ph1 | 0.726       | Z_O36_ph1    | 0.26734     |
| Scale_ph1_pat1    | 1.0232E-06  | Occ_V14_ph1  | 1           | Biso_O36_ph1 | 1.744       |
| Cell_A_ph1_pat1   | 26.3263     | X_V15_ph1    | 0.20147     | Occ_O36_ph1  | 1           |
| Scale_ph2_pat1    | 0.000945713 | Y_V15_ph1    | 0.20147     | X_O37_ph1    | 0.51715     |
| Cell_A_ph2_pat1   | 5.14198     | Z_V15_ph1    | 0.20147     | Y_O37_ph1    | 0.59745     |
| Cell_B_ph2_pat1   | 5.19771     | Biso_V15_ph1 | 0.813       | Z_O37_ph1    | 0.18395     |
| Cell_C_ph2_pat1   | 5.32425     | Occ_V15_ph1  | 1           | Biso_O37_ph1 | 1.871       |
| Cell_E_ph2_pat1   | 99.0942     | X_V16_ph1    | 0.53834     | Occ_O37_ph1  | 1           |
| Zero_pat1         | 0           | Y_V16_ph1    | 0.53834     | X_O38_ph1    | 0.60074     |
| SySin_pat1        | 0           | Z_V16_ph1    | 0.53834     | Y_O38_ph1    | 0.53739     |
| Lambda_pat1       | 1.54187     | Biso_V16_ph1 | 0.686       | Z_O38_ph1    | 0.20051     |
| PO_mabs_pat1      | 0           | Occ_V16_ph1  | 1           | Biso_O38_ph1 | 1.808       |
| Cp_mabs_pat1      | 0           | X_V17_ph1    | 0.12459     | Occ_O38_ph1  | 1           |
| Tau_mabs_pat1     | 0.1         | Y_V17_ph1    | 0.12459     | X_O39_ph1    | 0.51072     |
| Bck_0_pat1        | 0.999828    | Z_V17_ph1    | 0.12459     | Y_O39_ph1    | 0.25854     |
| Bck_2_pat1        | 0           | Biso_V17_ph1 | 0.734       | Z_O39_ph1    | 0.20207     |
| Bck_3_pat1        | 0           | Occ_V17_ph1  | 1           | Biso_O39_ph1 | 1.823       |
| Bover_ph1_pat1    | 0.009863    | X_O18_ph1    | 0.48004     | Occ_O39_ph1  | 1           |
| Strain1_ph1_pat1  | 0           | Y_O18_ph1    | 0.06539     | X_O40_ph1    | 0.59407     |
| Strain2_ph1_pat1  | 0           | Z_O18_ph1    | 0.1262      | Y_O40_ph1    | 0.19718     |
| Strain3_ph1_pat1  | 0           | Biso_O18_ph1 | 1.523       | Z_O40_ph1    | 0.19242     |
| G-Size_ph1_pat1   | 0           | Occ_O18_ph1  | 1           | Biso_O40_ph1 | 1.808       |
| L-Size_ph1_pat1   | 0           | X_O19_ph1    | 0.40009     | Occ_O40_ph1  | 1           |
| Y-cos_ph1_pat1    | 0           | Y_O19_ph1    | 0.12892     | X_O41_ph1    | 0.5323      |
| EtaRght0_ph1_pat1 | 0           | Z_O19_ph1    | 0.1466      | Y_O41_ph1    | 0.18804     |
| X-tan_ph1_pat1    | 0.0108357   | Biso_O19_ph1 | 1.871       | Z_O41_ph1    | 0.2758      |
| U-Cagl_ph1_pat1   | 0           | Occ_O19_ph1  | 1           | Biso_O41_ph1 | 1.847       |
| V-Cagl_ph1_pat1   | 0           | X_O20_ph1    | 0.47258     | Occ_O41_ph1  | 1           |
| W-Cagl_ph1_pat1   | 0.00358055  | Y_O20_ph1    | 0.15725     | X_O42_ph1    | 0.26222     |
| EtaPV_ph1_pat1    | 0.297546    | Z_O20_ph1    | 0.07648     | Y_O42_ph1    | 0.1951      |
| Cell_B_ph1_pat1   | 26.3263     | Biso_O20_ph1 | 1.555       | Z_O42_ph1    | 0.18376     |
| Cell_C_ph1_pat1   | 26.3263     | Occ_O20_ph1  | 1           | Biso_O42_ph1 | 1.958       |
| Cell_D_ph1_pat1   | 90          | X_O21_ph1    | 0.49048     | Occ_O42_ph1  | 1           |
| Cell_E_ph1_pat1   | 90          | Y_O21_ph1    | 0.39627     | X_O43_ph1    | 0.59815     |
| Cell_F_ph1_pat1   | 90          | Z_O21_ph1    | 0.12804     | Y_O43_ph1    | -0.01624    |
| Or1_ph1_pat1      | 0           | Biso_O21_ph1 | 1.618       | Z_O43_ph1    | 0.03707     |
| Or2_ph1_pat1      | 0           | Occ_O21_ph1  | 1           | Biso_O43_ph1 | 1.531       |
| Asym1_ph1_pat1    | 0           | X_O22_ph1    | 0.4726      | Occ_O43_ph1  | 1           |
| Asym2_ph1_pat1    | 0.0329566   | Y_O22_ph1    | 0.48128     | X_O44_ph1    | 0.06452     |
| Asym3_ph1_pat1    | 0           | Z_O22_ph1    | 0.07129     | Y_O44_ph1    | 0.14578     |
| Asym4_ph1_pat1    | 0           | Biso_O22_ph1 | 1.823       | Z_O44_ph1    | 0.12622     |
| X_Zr1_ph1         | 0.497434    | Occ_O22_ph1  | 1           | Biso_O44_ph1 | 1.713       |
| Y_Zr1_ph1         | -0.001114   | X_O23_ph1    | 0.41032     | Occ_O44_ph1  | 1           |
| Z_Zr1_ph1         | 0.165602    | Y_O23_ph1    | 0.45904     | X_O45_ph1    | 0.4973      |
| Biso_Zr1_ph1      | 0.497       | Z_O23_ph1    | 0.15181     | Y_O45_ph1    | 0.155       |
| Occ_Zr1_ph1       | 1           | Biso_O23_ph1 | 1.594       | Z_O45_ph1    | 0.1807      |

|              |          |              |         |                   |           |
|--------------|----------|--------------|---------|-------------------|-----------|
| X_Zr2_ph1    | 0.500084 | Occ_O23_ph1  | 1       | Biso_O45_ph1      | 2.423     |
| Y_Zr2_ph1    | 0.32661  | X_O24_ph1    | 0.3524  | Occ_O45_ph1       | 1         |
| Z_Zr2_ph1    | 0.164329 | Y_O24_ph1    | 0.3083  | X_O46_ph1         | 0.5101    |
| Biso_Zr2_ph1 | 0.481    | Z_O24_ph1    | 0.06917 | Y_O46_ph1         | 0.492     |
| Occ_Zr2_ph1  | 1        | Biso_O24_ph1 | 2.044   | Z_O46_ph1         | 0.1707    |
| X_Zr3_ph1    | 0.496217 | Occ_O24_ph1  | 1       | Biso_O46_ph1      | 2.55      |
| Y_Zr3_ph1    | 0.170143 | X_O25_ph1    | 0.3565  | Occ_O46_ph1       | 1         |
| Z_Zr3_ph1    | 0.34384  | Y_O25_ph1    | 0.22994 | X_O47_ph1         | 0.3362    |
| Biso_Zr3_ph1 | 0.426    | Z_O25_ph1    | 0.1359  | Y_O47_ph1         | 0.3271    |
| Occ_Zr3_ph1  | 1        | Biso_O25_ph1 | 2.218   | Z_O47_ph1         | 0.173     |
| X_Zr4_ph1    | 0.331355 | Occ_O25_ph1  | 1       | Biso_O47_ph1      | 2.866     |
| Y_Zr4_ph1    | 0.162024 | X_O26_ph1    | 0.43193 | Occ_O47_ph1       | 1         |
| Z_Zr4_ph1    | 0.166102 | Y_O26_ph1    | 0.3013  | X_O48_ph1         | 0.3357    |
| Biso_Zr4_ph1 | 0.505    | Z_O26_ph1    | 0.13571 | Y_O48_ph1         | 0.1759    |
| Occ_Zr4_ph1  | 1        | Biso_O26_ph1 | 1.91    | Z_O48_ph1         | 0.0004    |
| X_Zr5_ph1    | 0.334645 | Occ_O26_ph1  | 1       | Biso_O48_ph1      | 2.645     |
| Y_Zr5_ph1    | 0.334645 | X_O27_ph1    | 0.23557 | Occ_O48_ph1       | 1         |
| Z_Zr5_ph1    | 0.334645 | Y_O27_ph1    | 0.3606  | X_O49_ph1         | 0.16284   |
| Biso_Zr5_ph1 | 0.536    | Z_O27_ph1    | 0.18436 | Y_O49_ph1         | 0.16284   |
| Occ_Zr5_ph1  | 1        | Biso_O27_ph1 | 1.879   | Z_O49_ph1         | 0.16284   |
| X_Zr6_ph1    | 0        | Occ_O27_ph1  | 1       | Biso_O49_ph1      | 2.842     |
| Y_Zr6_ph1    | 0        | X_O28_ph1    | 0.3133  | Occ_O49_ph1       | 1         |
| Z_Zr6_ph1    | 0        | Y_O28_ph1    | 0.42848 | X_O50_ph1         | 0.5       |
| Biso_Zr6_ph1 | 0.505    | Z_O28_ph1    | 0.1951  | Y_O50_ph1         | 0.5       |
| Occ_Zr6_ph1  | 1        | Biso_O28_ph1 | 2.029   | Z_O50_ph1         | 0.5       |
| X_V7_ph1     | 0.46207  | Occ_O28_ph1  | 1       | Biso_O50_ph1      | 2.85      |
| Y_V7_ph1     | 0.12653  | X_O29_ph1    | 0.29834 | Occ_O50_ph1       | 1         |
| Z_V7_ph1     | 0.13145  | Y_O29_ph1    | 0.35604 | Bover_ph2_pat1    | 1.01542   |
| Biso_V7_ph1  | 0.781    | Z_O29_ph1    | 0.26787 | Strain1_ph2_pat1  | 0         |
| Occ_V7_ph1   | 1        | Biso_O29_ph1 | 1.831   | Strain2_ph2_pat1  | 0         |
| X_V8_ph1     | 0.4703   | Occ_O29_ph1  | 1       | Strain3_ph2_pat1  | 0         |
| Y_V8_ph1     | 0.45683  | X_O30_ph1    | 0.3018  | G-Size_ph2_pat1   | 0         |
| Z_V8_ph1     | 0.12993  | Y_O30_ph1    | 0.14271 | L-Size_ph2_pat1   | 0         |
| Biso_V8_ph1  | 0.742    | Z_O30_ph1    | 0.09573 | Y-cos_ph2_pat1    | 0         |
| Occ_V8_ph1   | 1        | Biso_O30_ph1 | 1.792   | EtaRght0_ph2_pat1 | 0         |
| X_V9_ph1     | 0.36952  | Occ_O30_ph1  | 1       | X-tan_ph2_pat1    | 0         |
| Y_V9_ph1     | 0.29152  | X_O31_ph1    | 0.24174 | U-Cagl_ph2_pat1   | 0         |
| Z_V9_ph1     | 0.12774  | Y_O31_ph1    | 0.12759 | V-Cagl_ph2_pat1   | 0         |
| Biso_V9_ph1  | 0.742    | Z_O31_ph1    | 0.01154 | W-Cagl_ph2_pat1   | 0.0803331 |
| Occ_V9_ph1   | 1        | Biso_O31_ph1 | 1.65    | EtaPV_ph2_pat1    | 0.29754   |
| X_V10_ph1    | 0.29521  | Occ_O31_ph1  | 1       | Cell_D_ph2_pat1   | 90        |
| Y_V10_ph1    | 0.36857  | X_O32_ph1    | 0.32893 | Cell_F_ph2_pat1   | 90        |
| Z_V10_ph1    | 0.20539  | Y_O32_ph1    | 0.07216 | Or1_ph2_pat1      | 0         |
| Biso_V10_ph1 | 0.757    | Z_O32_ph1    | 0.02455 | Or2_ph2_pat1      | 0         |
| Occ_V10_ph1  | 1        | Biso_O32_ph1 | 1.689   | Asym1_ph2_pat1    | 0         |
| X_V11_ph1    | 0.30164  | Occ_O32_ph1  | 1       | Asym2_ph2_pat1    | 0         |
| Y_V11_ph1    | 0.12878  | X_O33_ph1    | 0.35597 | Asym3_ph2_pat1    | 0         |
| Z_V11_ph1    | 0.03361  | Y_O33_ph1    | 0.27237 | Asym4_ph2_pat1    | 0         |
| Biso_V11_ph1 | 0.679    | Z_O33_ph1    | -       | X_Zr1_ph2         | 0.2758    |
|              |          |              | 0.03702 |                   |           |

|              |         |              |              |              |        |
|--------------|---------|--------------|--------------|--------------|--------|
| Occ_V11_ph1  | 1       | Biso_O33_ph1 | 1.587        | Y_Zr1_ph2    | 0.0411 |
| X_V12_ph1    | 0.37478 | Occ_O33_ph1  | 1            | Z_Zr1_ph2    | 0.2082 |
| Y_V12_ph1    | 0.21139 | X_O34_ph1    | 0.43498      | Biso_Zr1_ph2 | 0.303  |
| Z_V12_ph1    | -0.0395 | Y_O34_ph1    | 0.20653      | Occ_Zr1_ph2  | 1      |
| Biso_V12_ph1 | 0.765   | Z_O34_ph1    | -<br>0.01851 | X_O2_ph2     | 0.0703 |
| Occ_V12_ph1  | 1       | Biso_O34_ph1 | 1.721        | Y_O2_ph2     | 0.3359 |
| X_V13_ph1    | 0.53727 | Occ_O34_ph1  | 1            | Z_O2_ph2     | 0.3406 |
| Y_V13_ph1    | 0.54143 | X_O35_ph1    | 0.37015      | Biso_O2_ph2  | 0.316  |
| Z_V13_ph1    | 0.20594 | Y_O35_ph1    | 0.18931      | Occ_O2_ph2   | 1      |
| Biso_V13_ph1 | 0.757   | Z_O35_ph1    | -<br>0.09934 | X_O3_ph2     | 0.4423 |
| Occ_V13_ph1  | 1       | Biso_O35_ph1 | 1.808        | Y_O3_ph2     | 0.7549 |
| X_V14_ph1    | 0.53403 | Occ_O35_ph1  | 1            | Z_O3_ph2     | 0.4789 |
| Y_V14_ph1    | 0.20035 | X_O36_ph1    | 0.5206       | Biso_O3_ph2  | 0.228  |
| Occ_O3_ph2   | 1       |              |              |              |        |



Phase Analysis Report.  
Sample: sol-gel\_160 °C

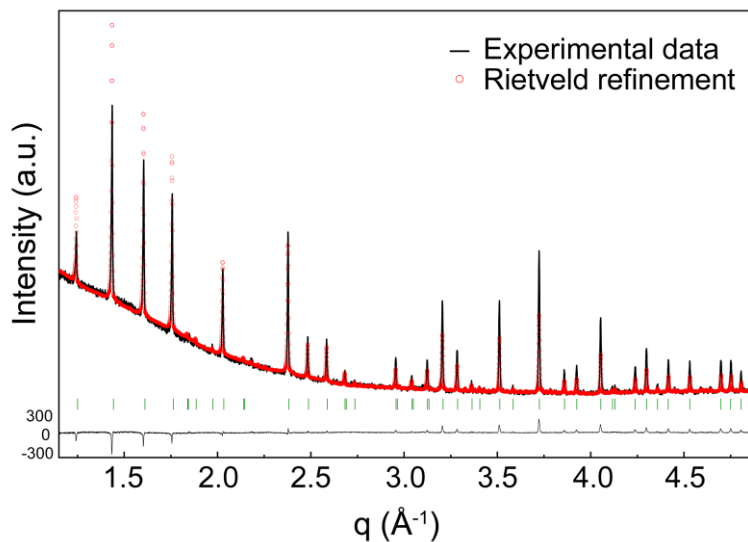

**Figure S6.** Rietveld refinement plot, showing the observed (black), calculated (red) and difference patterns of ZrV<sub>2</sub>O<sub>7</sub> sol-gel\_160 °C sample. Vertical lines indicate the positions of the Bragg reflections.

**Sample and refinement data**

|                                       |                              |
|---------------------------------------|------------------------------|
| Data range                            | 16.149° - 75.234° 2 $\theta$ |
| Original data range                   | 5.000° - 79.999°             |
| Step size                             | 0.009                        |
| Rietveld refinement converged         | Yes                          |
| $\alpha_2$ subtracted                 | No                           |
| Background subtracted                 | No                           |
| Data smoothed                         | No                           |
| 2theta correction                     | 0.08346°                     |
| Radiation                             | X-rays                       |
| Method                                | Rietveld refinement          |
| Automatic refinement                  | No                           |
| Final weighted average Bragg R factor | 43.4                         |
| Final reduced $\chi^2$                | 11.3                         |

**Matched phases**

| Amount (%) | Name                   | Formula sum | COD ID  |
|------------|------------------------|-------------|---------|
| 100        |                        | O7 V2 Zr    | 2002983 |
| 2.7        | Unidentified peak area |             |         |

### Parameter List for Refinement

| Parameter         | Final value | Parameter    | Final value | Parameter    | Final value |
|-------------------|-------------|--------------|-------------|--------------|-------------|
| Zero_pat1         | 0.0834608   | Occ_V12_ph1  | 1           | X_O32_ph1    | 0.32893     |
| Lambda_pat1       | 1.54035     | X_V13_ph1    | 0.53727     | Y_O32_ph1    | 0.07216     |
| Scale_ph1_pat1    | 1.99705E-07 | Y_V13_ph1    | 0.54143     | Z_O32_ph1    | 0.02455     |
| Asym2_ph1_pat1    | 0.0427402   | Z_V13_ph1    | 0.20594     | Biso_O32_ph1 | 1.689       |
| SyCos_pat1        | 0           | Biso_V13_ph1 | 0.757       | Occ_O32_ph1  | 1           |
| SySin_pat1        | 0           | Occ_V13_ph1  | 1           | X_O33_ph1    | 0.35597     |
| P0_mabs_pat1      | 0           | X_V14_ph1    | 0.53403     | Y_O33_ph1    | 0.27237     |
| Cp_mabs_pat1      | 0           | Y_V14_ph1    | 0.20035     | Z_O33_ph1    | -0.03702    |
| Tau_mabs_pat1     | 0.1         | Z_V14_ph1    | 0.21313     | Biso_O33_ph1 | 1.587       |
| Bck_0_pat1        | 1.00354     | Biso_V14_ph1 | 0.726       | Occ_O33_ph1  | 1           |
| Bck_1_pat1        | 0           | Occ_V14_ph1  | 1           | X_O34_ph1    | 0.43498     |
| Bck_2_pat1        | 0           | X_V15_ph1    | 0.20147     | Y_O34_ph1    | 0.20653     |
| Bck_3_pat1        | 0           | Y_V15_ph1    | 0.20147     | Z_O34_ph1    | -0.01851    |
| Bover_ph1_pat1    | 0           | Z_V15_ph1    | 0.20147     | Biso_O34_ph1 | 1.721       |
| Strain1_ph1_pat1  | 0           | Biso_V15_ph1 | 0.813       | Occ_O34_ph1  | 1           |
| Strain2_ph1_pat1  | 0           | Occ_V15_ph1  | 1           | X_O35_ph1    | 0.37015     |
| Strain3_ph1_pat1  | 0           | X_V16_ph1    | 0.53834     | Y_O35_ph1    | 0.18931     |
| G-Size_ph1_pat1   | 0           | Y_V16_ph1    | 0.53834     | Z_O35_ph1    | -0.09934    |
| L-Size_ph1_pat1   | 0           | Z_V16_ph1    | 0.53834     | Biso_O35_ph1 | 1.808       |
| Y-cos_ph1_pat1    | 0           | Biso_V16_ph1 | 0.686       | Occ_O35_ph1  | 1           |
| EtaRght0_ph1_pat1 | 0           | Occ_V16_ph1  | 1           | X_O36_ph1    | 0.5206      |
| X-tan_ph1_pat1    | 0           | X_V17_ph1    | 0.12459     | Y_O36_ph1    | 0.53508     |
| U-Cagl_ph1_pat1   | 0           | Y_V17_ph1    | 0.12459     | Z_O36_ph1    | 0.26734     |
| V-Cagl_ph1_pat1   | 0           | Z_V17_ph1    | 0.12459     | Biso_O36_ph1 | 1.744       |
| W-Cagl_ph1_pat1   | 0.0105257   | Biso_V17_ph1 | 0.734       | Occ_O36_ph1  | 1           |
| EtaPV_ph1_pat1    | 0.476126    | Occ_V17_ph1  | 1           | X_O37_ph1    | 0.51715     |
| Cell_A_ph1_pat1   | 26.2788     | X_O18_ph1    | 0.48004     | Y_O37_ph1    | 0.59745     |
| Cell_B_ph1_pat1   | 26.2788     | Y_O18_ph1    | 0.06539     | Z_O37_ph1    | 0.18395     |
| Cell_C_ph1_pat1   | 26.2788     | Z_O18_ph1    | 0.1262      | Biso_O37_ph1 | 1.871       |
| Cell_D_ph1_pat1   | 90          | Biso_O18_ph1 | 1.523       | Occ_O37_ph1  | 1           |
| Cell_E_ph1_pat1   | 90          | Occ_O18_ph1  | 1           | X_O38_ph1    | 0.60074     |
| Cell_F_ph1_pat1   | 90          | X_O19_ph1    | 0.40009     | Y_O38_ph1    | 0.53739     |
| Or1_ph1_pat1      | 0           | Y_O19_ph1    | 0.12892     | Z_O38_ph1    | 0.20051     |
| Or2_ph1_pat1      | 0           | Z_O19_ph1    | 0.1466      | Biso_O38_ph1 | 1.808       |
| Asym1_ph1_pat1    | 0           | Biso_O19_ph1 | 1.871       | Occ_O38_ph1  | 1           |
| Asym3_ph1_pat1    | 0           | Occ_O19_ph1  | 1           | X_O39_ph1    | 0.51072     |
| Asym4_ph1_pat1    | 0           | X_O20_ph1    | 0.47258     | Y_O39_ph1    | 0.25854     |
| X_Zr1_ph1         | 0.497434    | Y_O20_ph1    | 0.15725     | Z_O39_ph1    | 0.20207     |
| Y_Zr1_ph1         | -0.001114   | Z_O20_ph1    | 0.07648     | Biso_O39_ph1 | 1.823       |
| Z_Zr1_ph1         | 0.165602    | Biso_O20_ph1 | 1.555       | Occ_O39_ph1  | 1           |
| Biso_Zr1_ph1      | 0.497       | Occ_O20_ph1  | 1           | X_O40_ph1    | 0.59407     |
| Occ_Zr1_ph1       | 1           | X_O21_ph1    | 0.49048     | Y_O40_ph1    | 0.19718     |
| X_Zr2_ph1         | 0.500084    | Y_O21_ph1    | 0.39627     | Z_O40_ph1    | 0.19242     |
| Y_Zr2_ph1         | 0.32661     | Z_O21_ph1    | 0.12804     | Biso_O40_ph1 | 1.808       |
| Z_Zr2_ph1         | 0.164329    | Biso_O21_ph1 | 1.618       | Occ_O40_ph1  | 1           |
| Biso_Zr2_ph1      | 0.481       | Occ_O21_ph1  | 1           | X_O41_ph1    | 0.5323      |
| Occ_Zr2_ph1       | 1           | X_O22_ph1    | 0.4726      | Y_O41_ph1    | 0.18804     |
| X_Zr3_ph1         | 0.496217    | Y_O22_ph1    | 0.48128     | Z_O41_ph1    | 0.2758      |

|              |          |              |         |              |          |
|--------------|----------|--------------|---------|--------------|----------|
| Y_Zr3_ph1    | 0.170143 | Z_O22_ph1    | 0.07129 | Biso_O41_ph1 | 1.847    |
| Z_Zr3_ph1    | 0.34384  | Biso_O22_ph1 | 1.823   | Occ_O41_ph1  | 1        |
| Biso_Zr3_ph1 | 0.426    | Occ_O22_ph1  | 1       | X_O42_ph1    | 0.26222  |
| Occ_Zr3_ph1  | 1        | X_O23_ph1    | 0.41032 | Y_O42_ph1    | 0.1951   |
| X_Zr4_ph1    | 0.331355 | Y_O23_ph1    | 0.45904 | Z_O42_ph1    | 0.18376  |
| Y_Zr4_ph1    | 0.162024 | Z_O23_ph1    | 0.15181 | Biso_O42_ph1 | 1.958    |
| Z_Zr4_ph1    | 0.166102 | Biso_O23_ph1 | 1.594   | Occ_O42_ph1  | 1        |
| Biso_Zr4_ph1 | 0.505    | Occ_O23_ph1  | 1       | X_O43_ph1    | 0.59815  |
| Occ_Zr4_ph1  | 1        | X_O24_ph1    | 0.3524  | Y_O43_ph1    | -0.01624 |
| X_Zr5_ph1    | 0.334645 | Y_O24_ph1    | 0.3083  | Z_O43_ph1    | 0.03707  |
| Y_Zr5_ph1    | 0.334645 | Z_O24_ph1    | 0.06917 | Biso_O43_ph1 | 1.531    |
| Z_Zr5_ph1    | 0.334645 | Biso_O24_ph1 | 2.044   | Occ_O43_ph1  | 1        |
| Biso_Zr5_ph1 | 0.536    | Occ_O24_ph1  | 1       | X_O44_ph1    | 0.06452  |
| Occ_Zr5_ph1  | 1        | X_O25_ph1    | 0.3565  | Y_O44_ph1    | 0.14578  |
| X_Zr6_ph1    | 0        | Y_O25_ph1    | 0.22994 | Z_O44_ph1    | 0.12622  |
| Y_Zr6_ph1    | 0        | Z_O25_ph1    | 0.1359  | Biso_O44_ph1 | 1.713    |
| Z_Zr6_ph1    | 0        | Biso_O25_ph1 | 2.218   | Occ_O44_ph1  | 1        |
| Biso_Zr6_ph1 | 0.505    | Occ_O25_ph1  | 1       | X_O45_ph1    | 0.4973   |
| Occ_Zr6_ph1  | 1        | X_O26_ph1    | 0.43193 | Y_O45_ph1    | 0.155    |
| X_V7_ph1     | 0.46207  | Y_O26_ph1    | 0.3013  | Z_O45_ph1    | 0.1807   |
| Y_V7_ph1     | 0.12653  | Z_O26_ph1    | 0.13571 | Biso_O45_ph1 | 2.423    |
| Z_V7_ph1     | 0.13145  | Biso_O26_ph1 | 1.91    | Occ_O45_ph1  | 1        |
| Biso_V7_ph1  | 0.781    | Occ_O26_ph1  | 1       | X_O46_ph1    | 0.5101   |
| Occ_V7_ph1   | 1        | X_O27_ph1    | 0.23557 | Y_O46_ph1    | 0.492    |
| X_V8_ph1     | 0.4703   | Y_O27_ph1    | 0.3606  | Z_O46_ph1    | 0.1707   |
| Y_V8_ph1     | 0.45683  | Z_O27_ph1    | 0.18436 | Biso_O46_ph1 | 2.55     |
| Z_V8_ph1     | 0.12993  | Biso_O27_ph1 | 1.879   | Occ_O46_ph1  | 1        |
| Biso_V8_ph1  | 0.742    | Occ_O27_ph1  | 1       | X_O47_ph1    | 0.3362   |
| Occ_V8_ph1   | 1        | X_O28_ph1    | 0.3133  | Y_O47_ph1    | 0.3271   |
| X_V9_ph1     | 0.36952  | Y_O28_ph1    | 0.42848 | Z_O47_ph1    | 0.173    |
| Y_V9_ph1     | 0.29152  | Z_O28_ph1    | 0.1951  | Biso_O47_ph1 | 2.866    |
| Z_V9_ph1     | 0.12774  | Biso_O28_ph1 | 2.029   | Occ_O47_ph1  | 1        |
| Biso_V9_ph1  | 0.742    | Occ_O28_ph1  | 1       | X_O48_ph1    | 0.3357   |
| Occ_V9_ph1   | 1        | X_O29_ph1    | 0.29834 | Y_O48_ph1    | 0.1759   |
| X_V10_ph1    | 0.29521  | Y_O29_ph1    | 0.35604 | Z_O48_ph1    | 0.0004   |
| Y_V10_ph1    | 0.36857  | Z_O29_ph1    | 0.26787 | Biso_O48_ph1 | 2.645    |
| Z_V10_ph1    | 0.20539  | Biso_O29_ph1 | 1.831   | Occ_O48_ph1  | 1        |
| Biso_V10_ph1 | 0.757    | Occ_O29_ph1  | 1       | X_O49_ph1    | 0.16284  |
| Occ_V10_ph1  | 1        | X_O30_ph1    | 0.3018  | Y_O49_ph1    | 0.16284  |
| X_V11_ph1    | 0.30164  | Y_O30_ph1    | 0.14271 | Z_O49_ph1    | 0.16284  |
| Y_V11_ph1    | 0.12878  | Z_O30_ph1    | 0.09573 | Biso_O49_ph1 | 2.842    |
| Z_V11_ph1    | 0.03361  | Biso_O30_ph1 | 1.792   | Occ_O49_ph1  | 1        |
| Biso_V11_ph1 | 0.679    | Occ_O30_ph1  | 1       | X_O50_ph1    | 0.5      |
| Occ_V11_ph1  | 1        | X_O31_ph1    | 0.24174 | Y_O50_ph1    | 0.5      |
| X_V12_ph1    | 0.37478  | Y_O31_ph1    | 0.12759 | Z_O50_ph1    | 0.5      |
| Y_V12_ph1    | 0.21139  | Z_O31_ph1    | 0.01154 | Biso_O50_ph1 | 2.85     |
| Z_V12_ph1    | -0.0395  | Biso_O31_ph1 | 1.65    | Occ_O50_ph1  | 1        |
| Biso_V12_ph1 | 0.765    | Occ_O31_ph1  | 1       |              |          |

Phase Analysis Report.

Sample: sol-gel\_100 °C

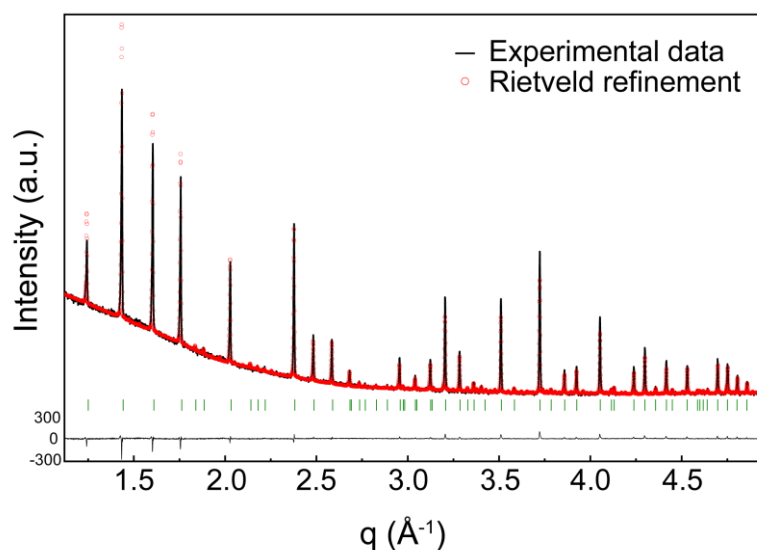

**Figure S7.** Rietveld refinement plot, showing the observed (black), calculated (red) and difference patterns of  $\text{ZrV}_2\text{O}_7$  sol-gel\_100 °C sample. Vertical lines indicate the positions of the Bragg reflections.

#### Sample and refinement data

|                                       |                              |
|---------------------------------------|------------------------------|
| Data range                            | 15.764° - 75.200° 2 $\theta$ |
| Original data range                   | 5.000° - 79.999°             |
| Step size                             | 0.009                        |
| Rietveld refinement converged         | Yes                          |
| $\alpha_2$ subtracted                 | No                           |
| Background subtracted                 | No                           |
| Data smoothed                         | No                           |
| 2theta correction                     | 0.07834°                     |
| Radiation                             | X-rays                       |
| Method                                | Rietveld refinement          |
| Automatic refinement                  | No                           |
| Final weighted average Bragg R factor | 19.4                         |
| Final reduced $\chi^2$                | 5.9                          |

#### Matched phases

| Amount (%) | Name                   | Formula sum | COD ID  |
|------------|------------------------|-------------|---------|
| 100        |                        | O7 V2 Zr    | 2002983 |
| 1.8        | Unidentified peak area |             |         |

### Parameter List for Refinement

| Parameter         | Final value | Parameter    | Final value | Parameter    | Final value |
|-------------------|-------------|--------------|-------------|--------------|-------------|
| Zero_pat1         | 0.0783446   | Occ_V12_ph1  | 1           | X_O32_ph1    | 0.32893     |
| Lambda_pat1       | 1.53686     | X_V13_ph1    | 0.53727     | Y_O32_ph1    | 0.07216     |
| Bck_0_pat1        | 0.986979    | Y_V13_ph1    | 0.54143     | Z_O32_ph1    | 0.02455     |
| Scale_ph1_pat1    | 4.51303E-07 | Z_V13_ph1    | 0.20594     | Biso_O32_ph1 | 1.689       |
| Cell_A_ph1_pat1   | 26.2248     | Biso_V13_ph1 | 0.757       | Occ_O32_ph1  | 1           |
| Asym2_ph1_pat1    | 0.0472528   | Occ_V13_ph1  | 1           | X_O33_ph1    | 0.35597     |
| SyCos_pat1        | 0           | X_V14_ph1    | 0.53403     | Y_O33_ph1    | 0.27237     |
| SySin_pat1        | 0           | Y_V14_ph1    | 0.20035     | Z_O33_ph1    | -0.03702    |
| PO_mabs_pat1      | 0           | Z_V14_ph1    | 0.21313     | Biso_O33_ph1 | 1.587       |
| Cp_mabs_pat1      | 0           | Biso_V14_ph1 | 0.726       | Occ_O33_ph1  | 1           |
| Tau_mabs_pat1     | 0.1         | Occ_V14_ph1  | 1           | X_O34_ph1    | 0.43498     |
| Bck_1_pat1        | 0           | X_V15_ph1    | 0.20147     | Y_O34_ph1    | 0.20653     |
| Bck_2_pat1        | 0           | Y_V15_ph1    | 0.20147     | Z_O34_ph1    | -0.01851    |
| Bck_3_pat1        | 0           | Z_V15_ph1    | 0.20147     | Biso_O34_ph1 | 1.721       |
| Bover_ph1_pat1    | 0           | Biso_V15_ph1 | 0.813       | Occ_O34_ph1  | 1           |
| Strain1_ph1_pat1  | 0           | Occ_V15_ph1  | 1           | X_O35_ph1    | 0.37015     |
| Strain2_ph1_pat1  | 0           | X_V16_ph1    | 0.53834     | Y_O35_ph1    | 0.18931     |
| Strain3_ph1_pat1  | 0           | Y_V16_ph1    | 0.53834     | Z_O35_ph1    | -0.09934    |
| G-Size_ph1_pat1   | 0           | Z_V16_ph1    | 0.53834     | Biso_O35_ph1 | 1.808       |
| L-Size_ph1_pat1   | 0           | Biso_V16_ph1 | 0.686       | Occ_O35_ph1  | 1           |
| Y-cos_ph1_pat1    | 0           | Occ_V16_ph1  | 1           | X_O36_ph1    | 0.5206      |
| EtaRght0_ph1_pat1 | 0           | X_V17_ph1    | 0.12459     | Y_O36_ph1    | 0.53508     |
| X-tan_ph1_pat1    | 0           | Y_V17_ph1    | 0.12459     | Z_O36_ph1    | 0.26734     |
| U-Cagl_ph1_pat1   | 0           | Z_V17_ph1    | 0.12459     | Biso_O36_ph1 | 1.744       |
| V-Cagl_ph1_pat1   | 0           | Biso_V17_ph1 | 0.734       | Occ_O36_ph1  | 1           |
| W-Cagl_ph1_pat1   | 0.00867596  | Occ_V17_ph1  | 1           | X_O37_ph1    | 0.51715     |
| EtaPV_ph1_pat1    | 0.207288    | X_O18_ph1    | 0.48004     | Y_O37_ph1    | 0.59745     |
| Cell_B_ph1_pat1   | 26.2245     | Y_O18_ph1    | 0.06539     | Z_O37_ph1    | 0.18395     |
| Cell_C_ph1_pat1   | 26.2245     | Z_O18_ph1    | 0.1262      | Biso_O37_ph1 | 1.871       |
| Cell_D_ph1_pat1   | 90          | Biso_O18_ph1 | 1.523       | Occ_O37_ph1  | 1           |
| Cell_E_ph1_pat1   | 90          | Occ_O18_ph1  | 1           | X_O38_ph1    | 0.60074     |
| Cell_F_ph1_pat1   | 90          | X_O19_ph1    | 0.40009     | Y_O38_ph1    | 0.53739     |
| Or1_ph1_pat1      | 0           | Y_O19_ph1    | 0.12892     | Z_O38_ph1    | 0.20051     |
| Or2_ph1_pat1      | 0           | Z_O19_ph1    | 0.1466      | Biso_O38_ph1 | 1.808       |
| Asym1_ph1_pat1    | 0           | Biso_O19_ph1 | 1.871       | Occ_O38_ph1  | 1           |
| Asym3_ph1_pat1    | 0           | Occ_O19_ph1  | 1           | X_O39_ph1    | 0.51072     |
| Asym4_ph1_pat1    | 0           | X_O20_ph1    | 0.47258     | Y_O39_ph1    | 0.25854     |
| X_Zr1_ph1         | 0.497434    | Y_O20_ph1    | 0.15725     | Z_O39_ph1    | 0.20207     |
| Y_Zr1_ph1         | -0.001114   | Z_O20_ph1    | 0.07648     | Biso_O39_ph1 | 1.823       |
| Z_Zr1_ph1         | 0.165602    | Biso_O20_ph1 | 1.555       | Occ_O39_ph1  | 1           |
| Biso_Zr1_ph1      | 0.497       | Occ_O20_ph1  | 1           | X_O40_ph1    | 0.59407     |
| Occ_Zr1_ph1       | 1           | X_O21_ph1    | 0.49048     | Y_O40_ph1    | 0.19718     |
| X_Zr2_ph1         | 0.500084    | Y_O21_ph1    | 0.39627     | Z_O40_ph1    | 0.19242     |
| Y_Zr2_ph1         | 0.32661     | Z_O21_ph1    | 0.12804     | Biso_O40_ph1 | 1.808       |
| Z_Zr2_ph1         | 0.164329    | Biso_O21_ph1 | 1.618       | Occ_O40_ph1  | 1           |
| Biso_Zr2_ph1      | 0.481       | Occ_O21_ph1  | 1           | X_O41_ph1    | 0.5323      |
| Occ_Zr2_ph1       | 1           | X_O22_ph1    | 0.4726      | Y_O41_ph1    | 0.18804     |
| X_Zr3_ph1         | 0.496217    | Y_O22_ph1    | 0.48128     | Z_O41_ph1    | 0.2758      |

|              |          |              |         |              |          |
|--------------|----------|--------------|---------|--------------|----------|
| Y_Zr3_ph1    | 0.170143 | Z_O22_ph1    | 0.07129 | Biso_O41_ph1 | 1.847    |
| Z_Zr3_ph1    | 0.34384  | Biso_O22_ph1 | 1.823   | Occ_O41_ph1  | 1        |
| Biso_Zr3_ph1 | 0.426    | Occ_O22_ph1  | 1       | X_O42_ph1    | 0.26222  |
| Occ_Zr3_ph1  | 1        | X_O23_ph1    | 0.41032 | Y_O42_ph1    | 0.1951   |
| X_Zr4_ph1    | 0.331355 | Y_O23_ph1    | 0.45904 | Z_O42_ph1    | 0.18376  |
| Y_Zr4_ph1    | 0.162024 | Z_O23_ph1    | 0.15181 | Biso_O42_ph1 | 1.958    |
| Z_Zr4_ph1    | 0.166102 | Biso_O23_ph1 | 1.594   | Occ_O42_ph1  | 1        |
| Biso_Zr4_ph1 | 0.505    | Occ_O23_ph1  | 1       | X_O43_ph1    | 0.59815  |
| Occ_Zr4_ph1  | 1        | X_O24_ph1    | 0.3524  | Y_O43_ph1    | -0.01624 |
| X_Zr5_ph1    | 0.334645 | Y_O24_ph1    | 0.3083  | Z_O43_ph1    | 0.03707  |
| Y_Zr5_ph1    | 0.334645 | Z_O24_ph1    | 0.06917 | Biso_O43_ph1 | 1.531    |
| Z_Zr5_ph1    | 0.334645 | Biso_O24_ph1 | 2.044   | Occ_O43_ph1  | 1        |
| Biso_Zr5_ph1 | 0.536    | Occ_O24_ph1  | 1       | X_O44_ph1    | 0.06452  |
| Occ_Zr5_ph1  | 1        | X_O25_ph1    | 0.3565  | Y_O44_ph1    | 0.14578  |
| X_Zr6_ph1    | 0        | Y_O25_ph1    | 0.22994 | Z_O44_ph1    | 0.12622  |
| Y_Zr6_ph1    | 0        | Z_O25_ph1    | 0.1359  | Biso_O44_ph1 | 1.713    |
| Z_Zr6_ph1    | 0        | Biso_O25_ph1 | 2.218   | Occ_O44_ph1  | 1        |
| Biso_Zr6_ph1 | 0.505    | Occ_O25_ph1  | 1       | X_O45_ph1    | 0.4973   |
| Occ_Zr6_ph1  | 1        | X_O26_ph1    | 0.43193 | Y_O45_ph1    | 0.155    |
| X_V7_ph1     | 0.46207  | Y_O26_ph1    | 0.3013  | Z_O45_ph1    | 0.1807   |
| Y_V7_ph1     | 0.12653  | Z_O26_ph1    | 0.13571 | Biso_O45_ph1 | 2.423    |
| Z_V7_ph1     | 0.13145  | Biso_O26_ph1 | 1.91    | Occ_O45_ph1  | 1        |
| Biso_V7_ph1  | 0.781    | Occ_O26_ph1  | 1       | X_O46_ph1    | 0.5101   |
| Occ_V7_ph1   | 1        | X_O27_ph1    | 0.23557 | Y_O46_ph1    | 0.492    |
| X_V8_ph1     | 0.4703   | Y_O27_ph1    | 0.3606  | Z_O46_ph1    | 0.1707   |
| Y_V8_ph1     | 0.45683  | Z_O27_ph1    | 0.18436 | Biso_O46_ph1 | 2.55     |
| Z_V8_ph1     | 0.12993  | Biso_O27_ph1 | 1.879   | Occ_O46_ph1  | 1        |
| Biso_V8_ph1  | 0.742    | Occ_O27_ph1  | 1       | X_O47_ph1    | 0.3362   |
| Occ_V8_ph1   | 1        | X_O28_ph1    | 0.3133  | Y_O47_ph1    | 0.3271   |
| X_V9_ph1     | 0.36952  | Y_O28_ph1    | 0.42848 | Z_O47_ph1    | 0.173    |
| Y_V9_ph1     | 0.29152  | Z_O28_ph1    | 0.1951  | Biso_O47_ph1 | 2.866    |
| Z_V9_ph1     | 0.12774  | Biso_O28_ph1 | 2.029   | Occ_O47_ph1  | 1        |
| Biso_V9_ph1  | 0.742    | Occ_O28_ph1  | 1       | X_O48_ph1    | 0.3357   |
| Occ_V9_ph1   | 1        | X_O29_ph1    | 0.29834 | Y_O48_ph1    | 0.1759   |
| X_V10_ph1    | 0.29521  | Y_O29_ph1    | 0.35604 | Z_O48_ph1    | 0.0004   |
| Y_V10_ph1    | 0.36857  | Z_O29_ph1    | 0.26787 | Biso_O48_ph1 | 2.645    |
| Z_V10_ph1    | 0.20539  | Biso_O29_ph1 | 1.831   | Occ_O48_ph1  | 1        |
| Biso_V10_ph1 | 0.757    | Occ_O29_ph1  | 1       | X_O49_ph1    | 0.16284  |
| Occ_V10_ph1  | 1        | X_O30_ph1    | 0.3018  | Y_O49_ph1    | 0.16284  |
| X_V11_ph1    | 0.30164  | Y_O30_ph1    | 0.14271 | Z_O49_ph1    | 0.16284  |
| Y_V11_ph1    | 0.12878  | Z_O30_ph1    | 0.09573 | Biso_O49_ph1 | 2.842    |
| Z_V11_ph1    | 0.03361  | Biso_O30_ph1 | 1.792   | Occ_O49_ph1  | 1        |
| Biso_V11_ph1 | 0.679    | Occ_O30_ph1  | 1       | X_O50_ph1    | 0.5      |
| Occ_V11_ph1  | 1        | X_O31_ph1    | 0.24174 | Y_O50_ph1    | 0.5      |
| X_V12_ph1    | 0.37478  | Y_O31_ph1    | 0.12759 | Z_O50_ph1    | 0.5      |
| Y_V12_ph1    | 0.21139  | Z_O31_ph1    | 0.01154 | Biso_O50_ph1 | 2.85     |
| Z_V12_ph1    | -0.0395  | Biso_O31_ph1 | 1.65    | Occ_O50_ph1  | 1        |
| Biso_V12_ph1 | 0.765    | Occ_O31_ph1  | 1       |              |          |

Phase Analysis Report.

Sample: sol-gel\_RO<sup>-</sup>

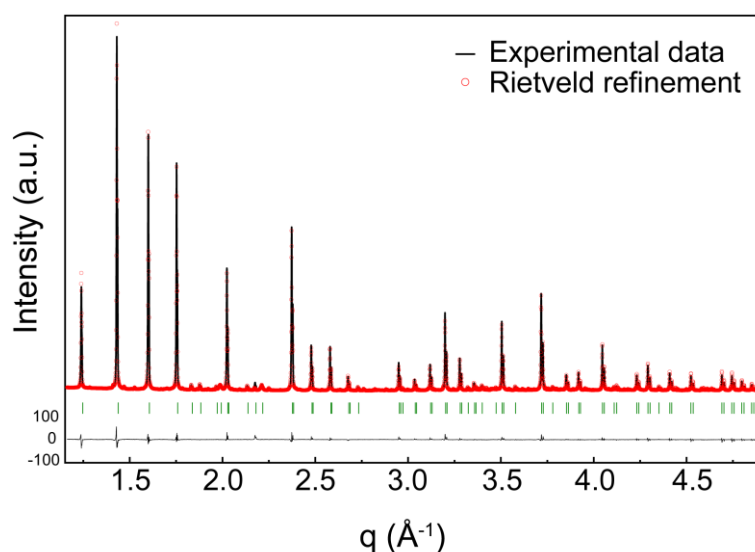

**Figure S8.** Rietveld refinement plot, showing the observed (black), calculated (red) and difference patterns of ZrV<sub>2</sub>O<sub>7</sub> sol-gel\_RO<sup>-</sup> sample. Vertical lines indicate the positions of the Bragg reflections.

#### Sample and refinement data

|                                                            |                              |
|------------------------------------------------------------|------------------------------|
| Data range                                                 | 16.417° - 74.822° 2 $\theta$ |
| Original data range                                        | 5.000° - 99.985°             |
| Step size                                                  | 0.010                        |
| Rietveld refinement converged                              | Yes                          |
| $\alpha_2$ subtracted                                      | No                           |
| Background subtracted                                      | No                           |
| Data smoothed                                              | No                           |
| Specimen displacement correction (Bragg-Brentano geometry) | T = (-s/R) = 0.00034842      |
| Radiation                                                  | X-rays                       |
| Method                                                     | Rietveld refinement          |
| Automatic refinement                                       | No                           |
| Final weighted average Bragg R factor                      | 5.2                          |
| Final reduced $\chi^2$                                     | 12.0                         |

#### Matched phases

| Amount (%) | Name                   | Formula sum | COD ID  |
|------------|------------------------|-------------|---------|
| 97.1       |                        | O7 V2 Zr    | 2002983 |
| 2.9        | Baddeleyite            | O2 Zr       | 9007485 |
| 3.6        | Unidentified peak area |             |         |

#### Parameter List for Refinement

| Parameter       | Final value | Parameter    | Final value | Parameter    | Final value |
|-----------------|-------------|--------------|-------------|--------------|-------------|
| SyCos_pat1      | 0.0399265   | Z_V14_ph1    | 0.21313     | Y_O36_ph1    | 0.53508     |
| Bck_0_pat1      | 1.00027     | Biso_V14_ph1 | 0.726       | Z_O36_ph1    | 0.26734     |
| Scale_ph1_pat1  | 1.32634E-06 | Occ_V14_ph1  | 1           | Biso_O36_ph1 | 1.744       |
| X-tan_ph1_pat1  | 0.00681974  | X_V15_ph1    | 0.20147     | Occ_O36_ph1  | 1           |
| W-Cagl_ph1_pat1 | 0.00267654  | Y_V15_ph1    | 0.20147     | X_O37_ph1    | 0.51715     |
| EtaPV_ph1_pat1  | 0.353666    | Z_V15_ph1    | 0.20147     | Y_O37_ph1    | 0.59745     |

|                   |             |              |         |              |          |
|-------------------|-------------|--------------|---------|--------------|----------|
| Cell_A_ph1_pat1   | 26.3265     | Biso_V15_ph1 | 0.813   | Z_O37_ph1    | 0.18395  |
| Scale_ph2_pat1    | 0.000339289 | Occ_V15_ph1  | 1       | Biso_O37_ph1 | 1.871    |
| Cell_A_ph2_pat1   | 5.14302     | X_V16_ph1    | 0.53834 | Occ_O37_ph1  | 1        |
| Cell_B_ph2_pat1   | 5.1998      | Y_V16_ph1    | 0.53834 | X_O38_ph1    | 0.60074  |
| Cell_C_ph2_pat1   | 5.3196      | Z_V16_ph1    | 0.53834 | Y_O38_ph1    | 0.53739  |
| Cell_E_ph2_pat1   | 99.1168     | Biso_V16_ph1 | 0.686   | Z_O38_ph1    | 0.20051  |
| Zero_pat1         | 0           | Occ_V16_ph1  | 1       | Biso_O38_ph1 | 1.808    |
| SySin_pat1        | 0           | X_V17_ph1    | 0.12459 | Occ_O38_ph1  | 1        |
| Lambda_pat1       | 1.54187     | Y_V17_ph1    | 0.12459 | X_O39_ph1    | 0.51072  |
| PO_mabs_pat1      | 0           | Z_V17_ph1    | 0.12459 | Y_O39_ph1    | 0.25854  |
| Cp_mabs_pat1      | 0           | Biso_V17_ph1 | 0.734   | Z_O39_ph1    | 0.20207  |
| Tau_mabs_pat1     | 0.1         | Occ_V17_ph1  | 1       | Biso_O39_ph1 | 1.823    |
| Bck_1_pat1        | 0           | X_O18_ph1    | 0.48004 | Occ_O39_ph1  | 1        |
| Bck_2_pat1        | 0           | Y_O18_ph1    | 0.06539 | X_O40_ph1    | 0.59407  |
| Bck_3_pat1        | 0           | Z_O18_ph1    | 0.1262  | Y_O40_ph1    | 0.19718  |
| Bover_ph1_pat1    | 0           | Biso_O18_ph1 | 1.523   | Z_O40_ph1    | 0.19242  |
| Strain1_ph1_pat1  | 0           | Occ_O18_ph1  | 1       | Biso_O40_ph1 | 1.808    |
| Strain2_ph1_pat1  | 0           | X_O19_ph1    | 0.40009 | Occ_O40_ph1  | 1        |
| Strain3_ph1_pat1  | 0           | Y_O19_ph1    | 0.12892 | X_O41_ph1    | 0.5323   |
| G-Size_ph1_pat1   | 0           | Z_O19_ph1    | 0.1466  | Y_O41_ph1    | 0.18804  |
| L-Size_ph1_pat1   | 0           | Biso_O19_ph1 | 1.871   | Z_O41_ph1    | 0.2758   |
| Y-cos_ph1_pat1    | 0           | Occ_O19_ph1  | 1       | Biso_O41_ph1 | 1.847    |
| EtaRght0_ph1_pat1 | 0           | X_O20_ph1    | 0.47258 | Occ_O41_ph1  | 1        |
| U-Cagl_ph1_pat1   | 0           | Y_O20_ph1    | 0.15725 | X_O42_ph1    | 0.26222  |
| V-Cagl_ph1_pat1   | 0           | Z_O20_ph1    | 0.07648 | Y_O42_ph1    | 0.1951   |
| Cell_B_ph1_pat1   | 26.3264     | Biso_O20_ph1 | 1.555   | Z_O42_ph1    | 0.18376  |
| Cell_C_ph1_pat1   | 26.3264     | Occ_O20_ph1  | 1       | Biso_O42_ph1 | 1.958    |
| Cell_D_ph1_pat1   | 90          | X_O21_ph1    | 0.49048 | Occ_O42_ph1  | 1        |
| Cell_E_ph1_pat1   | 90          | Y_O21_ph1    | 0.39627 | X_O43_ph1    | 0.59815  |
| Cell_F_ph1_pat1   | 90          | Z_O21_ph1    | 0.12804 | Y_O43_ph1    | -0.01624 |
| Or1_ph1_pat1      | 0           | Biso_O21_ph1 | 1.618   | Z_O43_ph1    | 0.03707  |
| Or2_ph1_pat1      | 0           | Occ_O21_ph1  | 1       | Biso_O43_ph1 | 1.531    |
| Asym1_ph1_pat1    | 0           | X_O22_ph1    | 0.4726  | Occ_O43_ph1  | 1        |
| Asym2_ph1_pat1    | 0.0283191   | Y_O22_ph1    | 0.48128 | X_O44_ph1    | 0.06452  |
| Asym3_ph1_pat1    | 0           | Z_O22_ph1    | 0.07129 | Y_O44_ph1    | 0.14578  |
| Asym4_ph1_pat1    | 0           | Biso_O22_ph1 | 1.823   | Z_O44_ph1    | 0.12622  |
| X_Zr1_ph1         | 0.497434    | Occ_O22_ph1  | 1       | Biso_O44_ph1 | 1.713    |
| Y_Zr1_ph1         | -0.001114   | X_O23_ph1    | 0.41032 | Occ_O44_ph1  | 1        |
| Z_Zr1_ph1         | 0.165602    | Y_O23_ph1    | 0.45904 | X_O45_ph1    | 0.4973   |
| Biso_Zr1_ph1      | 0.497       | Z_O23_ph1    | 0.15181 | Y_O45_ph1    | 0.155    |
| Occ_Zr1_ph1       | 1           | Biso_O23_ph1 | 1.594   | Z_O45_ph1    | 0.1807   |
| X_Zr2_ph1         | 0.500084    | Occ_O23_ph1  | 1       | Biso_O45_ph1 | 2.423    |
| Y_Zr2_ph1         | 0.32661     | X_O24_ph1    | 0.3524  | Occ_O45_ph1  | 1        |
| Z_Zr2_ph1         | 0.164329    | Y_O24_ph1    | 0.3083  | X_O46_ph1    | 0.5101   |
| Biso_Zr2_ph1      | 0.481       | Z_O24_ph1    | 0.06917 | Y_O46_ph1    | 0.492    |
| Occ_Zr2_ph1       | 1           | Biso_O24_ph1 | 2.044   | Z_O46_ph1    | 0.1707   |
| X_Zr3_ph1         | 0.496217    | Occ_O24_ph1  | 1       | Biso_O46_ph1 | 2.55     |
| Y_Zr3_ph1         | 0.170143    | X_O25_ph1    | 0.3565  | Occ_O46_ph1  | 1        |
| Z_Zr3_ph1         | 0.34384     | Y_O25_ph1    | 0.22994 | X_O47_ph1    | 0.3362   |
| Biso_Zr3_ph1      | 0.426       | Z_O25_ph1    | 0.1359  | Y_O47_ph1    | 0.3271   |



|              |          |              |          |                  |           |
|--------------|----------|--------------|----------|------------------|-----------|
| Occ_Zr3_ph1  | 1        | Biso_O25_ph1 | 2.218    | Z_O47_ph1        | 0.173     |
| X_Zr4_ph1    | 0.331355 | Occ_O25_ph1  | 1        | Biso_O47_ph1     | 2.866     |
| Y_Zr4_ph1    | 0.162024 | X_O26_ph1    | 0.43193  | Occ_O47_ph1      | 1         |
| Z_Zr4_ph1    | 0.166102 | Y_O26_ph1    | 0.3013   | X_O48_ph1        | 0.3357    |
| Biso_Zr4_ph1 | 0.505    | Z_O26_ph1    | 0.13571  | Y_O48_ph1        | 0.1759    |
| Occ_Zr4_ph1  | 1        | Biso_O26_ph1 | 1.91     | Z_O48_ph1        | 0.0004    |
| X_Zr5_ph1    | 0.334645 | Occ_O26_ph1  | 1        | Biso_O48_ph1     | 2.645     |
| Y_Zr5_ph1    | 0.334645 | X_O27_ph1    | 0.23557  | Occ_O48_ph1      | 1         |
| Z_Zr5_ph1    | 0.334645 | Y_O27_ph1    | 0.3606   | X_O49_ph1        | 0.16284   |
| Biso_Zr5_ph1 | 0.536    | Z_O27_ph1    | 0.18436  | Y_O49_ph1        | 0.16284   |
| Occ_Zr5_ph1  | 1        | Biso_O27_ph1 | 1.879    | Z_O49_ph1        | 0.16284   |
| X_Zr6_ph1    | 0        | Occ_O27_ph1  | 1        | Biso_O49_ph1     | 2.842     |
| Y_Zr6_ph1    | 0        | X_O28_ph1    | 0.3133   | Occ_O49_ph1      | 1         |
| Z_Zr6_ph1    | 0        | Y_O28_ph1    | 0.42848  | X_O50_ph1        | 0.5       |
| Biso_Zr6_ph1 | 0.505    | Z_O28_ph1    | 0.1951   | Y_O50_ph1        | 0.5       |
| Occ_Zr6_ph1  | 1        | Biso_O28_ph1 | 2.029    | Z_O50_ph1        | 0.5       |
| X_V7_ph1     | 0.46207  | Occ_O28_ph1  | 1        | Biso_O50_ph1     | 2.85      |
| Y_V7_ph1     | 0.12653  | X_O29_ph1    | 0.29834  | Occ_O50_ph1      | 1         |
| Z_V7_ph1     | 0.13145  | Y_O29_ph1    | 0.35604  | Bover_ph2_pat1   | 0         |
| Biso_V7_ph1  | 0.781    | Z_O29_ph1    | 0.26787  | Strain1_ph2_pat1 | 0         |
| Occ_V7_ph1   | 1        | Biso_O29_ph1 | 1.831    | Strain2_ph2_pat1 | 0         |
| X_V8_ph1     | 0.4703   | Occ_O29_ph1  | 1        | Strain3_ph2_pat1 | 0         |
| Y_V8_ph1     | 0.45683  | X_O30_ph1    | 0.3018   | G-Size_ph2_pat1  | 0         |
| Z_V8_ph1     | 0.12993  | Y_O30_ph1    | 0.14271  | L-Size_ph2_pat1  | 0         |
| Biso_V8_ph1  | 0.742    | Z_O30_ph1    | 0.09573  | Y-cos_ph2_pat1   | 0         |
| Occ_V8_ph1   | 1        | Biso_O30_ph1 | 1.792    | X-tan_ph2_pat1   | 0.0132543 |
| X_V9_ph1     | 0.36952  | Occ_O30_ph1  | 1        | U-Cagl_ph2_pat1  | 0         |
| Y_V9_ph1     | 0.29152  | X_O31_ph1    | 0.24174  | V-Cagl_ph2_pat1  | 0         |
| Z_V9_ph1     | 0.12774  | Y_O31_ph1    | 0.12759  | W-Cagl_ph2_pat1  | 0.037521  |
| Biso_V9_ph1  | 0.742    | Z_O31_ph1    | 0.01154  | EtaPV_ph2_pat1   | 0.06132   |
| Occ_V9_ph1   | 1        | Biso_O31_ph1 | 1.65     | Cell_D_ph2_pat1  | 90        |
| X_V10_ph1    | 0.29521  | Occ_O31_ph1  | 1        | Cell_F_ph2_pat1  | 90        |
| Y_V10_ph1    | 0.36857  | X_O32_ph1    | 0.32893  | Or1_ph2_pat1     | 0         |
| Z_V10_ph1    | 0.20539  | Y_O32_ph1    | 0.07216  | Or2_ph2_pat1     | 0         |
| Biso_V10_ph1 | 0.757    | Z_O32_ph1    | 0.02455  | Asym1_ph2_pat1   | 0         |
| Occ_V10_ph1  | 1        | Biso_O32_ph1 | 1.689    | Asym2_ph2_pat1   | 0         |
| X_V11_ph1    | 0.30164  | Occ_O32_ph1  | 1        | Asym3_ph2_pat1   | 0         |
| Y_V11_ph1    | 0.12878  | X_O33_ph1    | 0.35597  | Asym4_ph2_pat1   | 0         |
| Z_V11_ph1    | 0.03361  | Y_O33_ph1    | 0.27237  | X_Zr1_ph2        | 0.2758    |
| Biso_V11_ph1 | 0.679    | Z_O33_ph1    | -0.03702 | Y_Zr1_ph2        | 0.0411    |
| Occ_V11_ph1  | 1        | Biso_O33_ph1 | 1.587    | Z_Zr1_ph2        | 0.2082    |
| X_V12_ph1    | 0.37478  | Occ_O33_ph1  | 1        | Biso_Zr1_ph2     | 0.303     |
| Y_V12_ph1    | 0.21139  | X_O34_ph1    | 0.43498  | Occ_Zr1_ph2      | 1         |
| Z_V12_ph1    | -0.0395  | Y_O34_ph1    | 0.20653  | X_O2_ph2         | 0.0703    |
| Biso_V12_ph1 | 0.765    | Z_O34_ph1    | -0.01851 | Y_O2_ph2         | 0.3359    |
| Occ_V12_ph1  | 1        | Biso_O34_ph1 | 1.721    | Z_O2_ph2         | 0.3406    |
| X_V13_ph1    | 0.53727  | Occ_O34_ph1  | 1        | Biso_O2_ph2      | 0.316     |
| Y_V13_ph1    | 0.54143  | X_O35_ph1    | 0.37015  | Occ_O2_ph2       | 1         |
| Z_V13_ph1    | 0.20594  | Y_O35_ph1    | 0.18931  | X_O3_ph2         | 0.4423    |
| Biso_V13_ph1 | 0.757    | Z_O35_ph1    | -0.09934 | Y_O3_ph2         | 0.7549    |

|             |         |              |        |             |        |
|-------------|---------|--------------|--------|-------------|--------|
| Occ_V13_ph1 | 1       | Biso_O35_ph1 | 1.808  | Z_O3_ph2    | 0.4789 |
| X_V14_ph1   | 0.53403 | Occ_O35_ph1  | 1      | Biso_O3_ph2 | 0.228  |
| Y_V14_ph1   | 0.20035 | X_O36_ph1    | 0.5206 | Occ_O3_ph2  | 1      |

Phase Analysis Report.  
Sample: sol-gel\_Cl

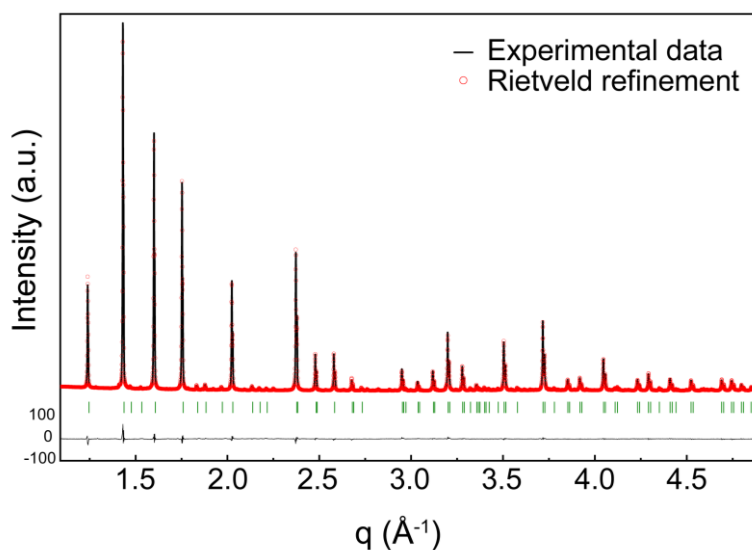

**Figure S9.** Rietveld refinement plot, showing the observed (black), calculated (red) and difference patterns of  $ZrV_2O_7$  sol-gel\_Cl sample. Vertical lines indicate the positions of the Bragg reflections.

**Sample and refinement data**

|                                                            |                              |
|------------------------------------------------------------|------------------------------|
| Data range                                                 | 15.423° - 75.053° 2 $\theta$ |
| Original data range                                        | 5.000° - 99.985°             |
| Step size                                                  | 0.010                        |
| Rietveld refinement converged                              | Yes                          |
| $\alpha_2$ subtracted                                      | No                           |
| Background subtracted                                      | No                           |
| Data smoothed                                              | No                           |
| Specimen displacement correction (Bragg-Brentano geometry) | $T = (-s/R) = 0.00028593$    |
| Radiation                                                  | X-rays                       |
| Method                                                     | Rietveld refinement          |
| Automatic refinement                                       | No                           |
| Final weighted average Bragg R factor                      | 4.6                          |
| Final reduced $\chi^2$                                     | 8.4                          |

**Matched phases**

| Amount (%) | Name                   | Formula sum | COD ID  |
|------------|------------------------|-------------|---------|
| 100        |                        | O7 V2 Zr    | 2002983 |
| 3.0        | Unidentified peak area |             |         |

### Parameter List for Refinement

| Parameter         | Final value | Parameter    | Final value | Parameter    | Final value |
|-------------------|-------------|--------------|-------------|--------------|-------------|
| SyCos_pat1        | 0.0327651   | Occ_V12_ph1  | 1           | X_O32_ph1    | 0.32893     |
| Bck_0_pat1        | 0.785282    | X_V13_ph1    | 0.53727     | Y_O32_ph1    | 0.07216     |
| Bck_1_pat1        | 183.653     | Y_V13_ph1    | 0.54143     | Z_O32_ph1    | 0.02455     |
| Bck_2_pat1        | -0.0289183  | Z_V13_ph1    | 0.20594     | Biso_O32_ph1 | 1.689       |
| Bck_3_pat1        | 1.77543     | Biso_V13_ph1 | 0.757       | Occ_O32_ph1  | 1           |
| Scale_ph1_pat1    | 1.33317E-06 | Occ_V13_ph1  | 1           | X_O33_ph1    | 0.35597     |
| X-tan_ph1_pat1    | 0.0101414   | X_V14_ph1    | 0.53403     | Y_O33_ph1    | 0.27237     |
| U-Cagl_ph1_pat1   | 0.0129125   | Y_V14_ph1    | 0.20035     | Z_O33_ph1    | -0.03702    |
| V-Cagl_ph1_pat1   | -0.00415464 | Z_V14_ph1    | 0.21313     | Biso_O33_ph1 | 1.587       |
| W-Cagl_ph1_pat1   | 0.00367856  | Biso_V14_ph1 | 0.726       | Occ_O33_ph1  | 1           |
| EtaPV_ph1_pat1    | 0.285648    | Occ_V14_ph1  | 1           | X_O34_ph1    | 0.43498     |
| Cell_A_ph1_pat1   | 26.3282     | X_V15_ph1    | 0.20147     | Y_O34_ph1    | 0.20653     |
| Asym2_ph1_pat1    | 0.0269896   | Y_V15_ph1    | 0.20147     | Z_O34_ph1    | -0.01851    |
| Zero_pat1         | 0           | Z_V15_ph1    | 0.20147     | Biso_O34_ph1 | 1.721       |
| SySin_pat1        | 0           | Biso_V15_ph1 | 0.813       | Occ_O34_ph1  | 1           |
| Lambda_pat1       | 1.54187     | Occ_V15_ph1  | 1           | X_O35_ph1    | 0.37015     |
| P0_mabs_pat1      | 0           | X_V16_ph1    | 0.53834     | Y_O35_ph1    | 0.18931     |
| Cp_mabs_pat1      | 0           | Y_V16_ph1    | 0.53834     | Z_O35_ph1    | -0.09934    |
| Tau_mabs_pat1     | 0.1         | Z_V16_ph1    | 0.53834     | Biso_O35_ph1 | 1.808       |
| Bover_ph1_pat1    | 0           | Biso_V16_ph1 | 0.686       | Occ_O35_ph1  | 1           |
| Strain1_ph1_pat1  | 0           | Occ_V16_ph1  | 1           | X_O36_ph1    | 0.5206      |
| Strain2_ph1_pat1  | 0           | X_V17_ph1    | 0.12459     | Y_O36_ph1    | 0.53508     |
| Strain3_ph1_pat1  | 0           | Y_V17_ph1    | 0.12459     | Z_O36_ph1    | 0.26734     |
| G-Size_ph1_pat1   | 0           | Z_V17_ph1    | 0.12459     | Biso_O36_ph1 | 1.744       |
| L-Size_ph1_pat1   | 0           | Biso_V17_ph1 | 0.734       | Occ_O36_ph1  | 1           |
| Y-cos_ph1_pat1    | 0           | Occ_V17_ph1  | 1           | X_O37_ph1    | 0.51715     |
| EtaRght0_ph1_pat1 | 0           | X_O18_ph1    | 0.48004     | Y_O37_ph1    | 0.59745     |
| Cell_B_ph1_pat1   | 26.3274     | Y_O18_ph1    | 0.06539     | Z_O37_ph1    | 0.18395     |
| Cell_C_ph1_pat1   | 26.3274     | Z_O18_ph1    | 0.1262      | Biso_O37_ph1 | 1.871       |
| Cell_D_ph1_pat1   | 90          | Biso_O18_ph1 | 1.523       | Occ_O37_ph1  | 1           |
| Cell_E_ph1_pat1   | 90          | Occ_O18_ph1  | 1           | X_O38_ph1    | 0.60074     |
| Cell_F_ph1_pat1   | 90          | X_O19_ph1    | 0.40009     | Y_O38_ph1    | 0.53739     |
| Or1_ph1_pat1      | 0           | Y_O19_ph1    | 0.12892     | Z_O38_ph1    | 0.20051     |
| Or2_ph1_pat1      | 0           | Z_O19_ph1    | 0.1466      | Biso_O38_ph1 | 1.808       |
| Asym1_ph1_pat1    | 0           | Biso_O19_ph1 | 1.871       | Occ_O38_ph1  | 1           |
| Asym3_ph1_pat1    | 0           | Occ_O19_ph1  | 1           | X_O39_ph1    | 0.51072     |
| Asym4_ph1_pat1    | 0           | X_O20_ph1    | 0.47258     | Y_O39_ph1    | 0.25854     |
| X_Zr1_ph1         | 0.497434    | Y_O20_ph1    | 0.15725     | Z_O39_ph1    | 0.20207     |
| Y_Zr1_ph1         | -0.001114   | Z_O20_ph1    | 0.07648     | Biso_O39_ph1 | 1.823       |
| Z_Zr1_ph1         | 0.165602    | Biso_O20_ph1 | 1.555       | Occ_O39_ph1  | 1           |
| Biso_Zr1_ph1      | 0.497       | Occ_O20_ph1  | 1           | X_O40_ph1    | 0.59407     |
| Occ_Zr1_ph1       | 1           | X_O21_ph1    | 0.49048     | Y_O40_ph1    | 0.19718     |
| X_Zr2_ph1         | 0.500084    | Y_O21_ph1    | 0.39627     | Z_O40_ph1    | 0.19242     |
| Y_Zr2_ph1         | 0.32661     | Z_O21_ph1    | 0.12804     | Biso_O40_ph1 | 1.808       |
| Z_Zr2_ph1         | 0.164329    | Biso_O21_ph1 | 1.618       | Occ_O40_ph1  | 1           |
| Biso_Zr2_ph1      | 0.481       | Occ_O21_ph1  | 1           | X_O41_ph1    | 0.5323      |
| Occ_Zr2_ph1       | 1           | X_O22_ph1    | 0.4726      | Y_O41_ph1    | 0.18804     |
| X_Zr3_ph1         | 0.496217    | Y_O22_ph1    | 0.48128     | Z_O41_ph1    | 0.2758      |
| Y_Zr3_ph1         | 0.170143    | Z_O22_ph1    | 0.07129     | Biso_O41_ph1 | 1.847       |
| Z_Zr3_ph1         | 0.34384     | Biso_O22_ph1 | 1.823       | Occ_O41_ph1  | 1           |
| Biso_Zr3_ph1      | 0.426       | Occ_O22_ph1  | 1           | X_O42_ph1    | 0.26222     |
| Occ_Zr3_ph1       | 1           | X_O23_ph1    | 0.41032     | Y_O42_ph1    | 0.1951      |
| X_Zr4_ph1         | 0.331355    | Y_O23_ph1    | 0.45904     | Z_O42_ph1    | 0.18376     |
| Y_Zr4_ph1         | 0.162024    | Z_O23_ph1    | 0.15181     | Biso_O42_ph1 | 1.958       |
| Z_Zr4_ph1         | 0.166102    | Biso_O23_ph1 | 1.594       | Occ_O42_ph1  | 1           |
| Biso_Zr4_ph1      | 0.505       | Occ_O23_ph1  | 1           | X_O43_ph1    | 0.59815     |
| Occ_Zr4_ph1       | 1           | X_O24_ph1    | 0.3524      | Y_O43_ph1    | -0.01624    |
| X_Zr5_ph1         | 0.334645    | Y_O24_ph1    | 0.3083      | Z_O43_ph1    | 0.03707     |

|              |          |              |         |              |         |
|--------------|----------|--------------|---------|--------------|---------|
| Y_Zr5_ph1    | 0.334645 | Z_O24_ph1    | 0.06917 | Biso_O43_ph1 | 1.531   |
| Z_Zr5_ph1    | 0.334645 | Biso_O24_ph1 | 2.044   | Occ_O43_ph1  | 1       |
| Biso_Zr5_ph1 | 0.536    | Occ_O24_ph1  | 1       | X_O44_ph1    | 0.06452 |
| Occ_Zr5_ph1  | 1        | X_O25_ph1    | 0.3565  | Y_O44_ph1    | 0.14578 |
| X_Zr6_ph1    | 0        | Y_O25_ph1    | 0.22994 | Z_O44_ph1    | 0.12622 |
| Y_Zr6_ph1    | 0        | Z_O25_ph1    | 0.1359  | Biso_O44_ph1 | 1.713   |
| Z_Zr6_ph1    | 0        | Biso_O25_ph1 | 2.218   | Occ_O44_ph1  | 1       |
| Biso_Zr6_ph1 | 0.505    | Occ_O25_ph1  | 1       | X_O45_ph1    | 0.4973  |
| Occ_Zr6_ph1  | 1        | X_O26_ph1    | 0.43193 | Y_O45_ph1    | 0.155   |
| X_V7_ph1     | 0.46207  | Y_O26_ph1    | 0.3013  | Z_O45_ph1    | 0.1807  |
| Y_V7_ph1     | 0.12653  | Z_O26_ph1    | 0.13571 | Biso_O45_ph1 | 2.423   |
| Z_V7_ph1     | 0.13145  | Biso_O26_ph1 | 1.91    | Occ_O45_ph1  | 1       |
| Biso_V7_ph1  | 0.781    | Occ_O26_ph1  | 1       | X_O46_ph1    | 0.5101  |
| Occ_V7_ph1   | 1        | X_O27_ph1    | 0.23557 | Y_O46_ph1    | 0.492   |
| X_V8_ph1     | 0.4703   | Y_O27_ph1    | 0.3606  | Z_O46_ph1    | 0.1707  |
| Y_V8_ph1     | 0.45683  | Z_O27_ph1    | 0.18436 | Biso_O46_ph1 | 2.55    |
| Z_V8_ph1     | 0.12993  | Biso_O27_ph1 | 1.879   | Occ_O46_ph1  | 1       |
| Biso_V8_ph1  | 0.742    | Occ_O27_ph1  | 1       | X_O47_ph1    | 0.3362  |
| Occ_V8_ph1   | 1        | X_O28_ph1    | 0.3133  | Y_O47_ph1    | 0.3271  |
| X_V9_ph1     | 0.36952  | Y_O28_ph1    | 0.42848 | Z_O47_ph1    | 0.173   |
| Y_V9_ph1     | 0.29152  | Z_O28_ph1    | 0.1951  | Biso_O47_ph1 | 2.866   |
| Z_V9_ph1     | 0.12774  | Biso_O28_ph1 | 2.029   | Occ_O47_ph1  | 1       |
| Biso_V9_ph1  | 0.742    | Occ_O28_ph1  | 1       | X_O48_ph1    | 0.3357  |
| Occ_V9_ph1   | 1        | X_O29_ph1    | 0.29834 | Y_O48_ph1    | 0.1759  |
| X_V10_ph1    | 0.29521  | Y_O29_ph1    | 0.35604 | Z_O48_ph1    | 0.0004  |
| Y_V10_ph1    | 0.36857  | Z_O29_ph1    | 0.26787 | Biso_O48_ph1 | 2.645   |
| Z_V10_ph1    | 0.20539  | Biso_O29_ph1 | 1.831   | Occ_O48_ph1  | 1       |
| Biso_V10_ph1 | 0.757    | Occ_O29_ph1  | 1       | X_O49_ph1    | 0.16284 |
| Occ_V10_ph1  | 1        | X_O30_ph1    | 0.3018  | Y_O49_ph1    | 0.16284 |
| X_V11_ph1    | 0.30164  | Y_O30_ph1    | 0.14271 | Z_O49_ph1    | 0.16284 |
| Y_V11_ph1    | 0.12878  | Z_O30_ph1    | 0.09573 | Biso_O49_ph1 | 2.842   |
| Z_V11_ph1    | 0.03361  | Biso_O30_ph1 | 1.792   | Occ_O49_ph1  | 1       |
| Biso_V11_ph1 | 0.679    | Occ_O30_ph1  | 1       | X_O50_ph1    | 0.5     |
| Occ_V11_ph1  | 1        | X_O31_ph1    | 0.24174 | Y_O50_ph1    | 0.5     |
| X_V12_ph1    | 0.37478  | Y_O31_ph1    | 0.12759 | Z_O50_ph1    | 0.5     |
| Y_V12_ph1    | 0.21139  | Z_O31_ph1    | 0.01154 | Biso_O50_ph1 | 2.85    |
| Z_V12_ph1    | -0.0395  | Biso_O31_ph1 | 1.65    | Occ_O50_ph1  | 1       |
| Biso_V12_ph1 | 0.765    | Occ_O31_ph1  | 1       |              |         |

## Raman spectroscopy

### Experimental analysis

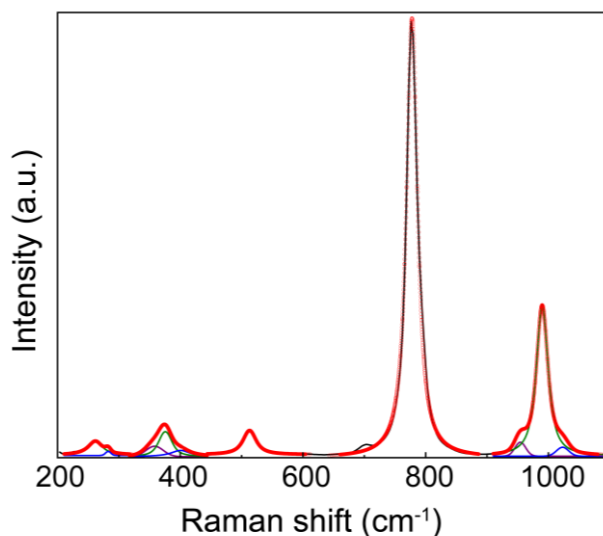

**Figure S10.** Fitted experimental Raman spectrum of sol-gel\_100 °C sample at room temperature.

**Table S2.** A comparison of calculated frequencies with those obtained from fitting the experimental spectra. The Raman band positions were determined by peak fitting of the averaged spectra with the Voigt model. The frequency difference is defined as:

$$\Delta\omega = |\omega_{fit} - \omega_{calc}|.$$

Values marked in green were evaluated to fit best with the experimental spectra.

| Experimental fitted peak position, (cm <sup>-1</sup> ) | Calculated peak position, (cm <sup>-1</sup> ) | $\Delta\omega =  \omega_{fit} - \omega_{calc} $ , (cm <sup>-1</sup> ) |
|--------------------------------------------------------|-----------------------------------------------|-----------------------------------------------------------------------|
| 261.8 ± 0.75                                           | 254.48                                        | 7.3                                                                   |
|                                                        | 262.66                                        | 0.9                                                                   |
| 358 ± 11.9                                             | 348.48                                        | 10                                                                    |
| 376 ± 1.6                                              | 366.16                                        | 10                                                                    |
| 400 ± 9.0                                              | 384.91                                        | 15                                                                    |
| 513.1 ± 0.19                                           | 492.88                                        | 20.2                                                                  |
|                                                        | 497.35                                        | 15.8                                                                  |
| 777.79 ± 0.091                                         | 798.75                                        | 20.96                                                                 |
|                                                        | 812.48                                        | 34.69                                                                 |
| 954.3 ± 0.16                                           | 967.20                                        | 12.9                                                                  |
| 989.93 ± 0.015                                         | 1004.46                                       | 14.53                                                                 |
| 1023.1 ± 0.29                                          | 1036.49                                       | 13.4                                                                  |

### Computational simulations

The total energy was strictly converged using a  $\Gamma$ -centre grid of (6×6×6) k-points and  $\Delta E < 10^{-8}$  and  $\Delta E < 10^{-6}$  eV for the electronic and structural optimisation, respectively. A supercell approach in the framework of the finite displacement method, as implemented in Phonopy<sup>3,4</sup>, was used to compute the harmonic vibrational properties of the material. A supercell of (3×3×3) with displacements of 0.01 Å was used to extract the harmonic force constants. The corresponding force calculations were done at  $\Gamma$ -point. Finally, to correct long-ranging dipole-dipole interaction, Born effective charge computations were also performed, and the non-analytical term correction as implemented in

Phonopy was applied<sup>5,6</sup>. After determining phonon eigenvectors and frequencies, Raman-active modes were extracted with Phonopy at the Gamma point by analysing the irreducible representations. A given mode is Raman-active if its irreducible representation (irrep) basis functions are quadratic ( $xy$ ,  $x^2$  etc.). This data was taken from the Bilbao Crystallographic Server point group tables.

GIFs of Raman active phonon vibrations were created using the phonon website, where computed atomic vibrations according to particular phonon modes can be visualised:

<https://henriquemiranda.github.io/phononwebsite/phonon.html>

The complete dataset, including visualization of phonon vibrations, is available at DOI: 10.5281/zenodo.12688634.<sup>7</sup>

### Scanning electron microscopy (SEM)

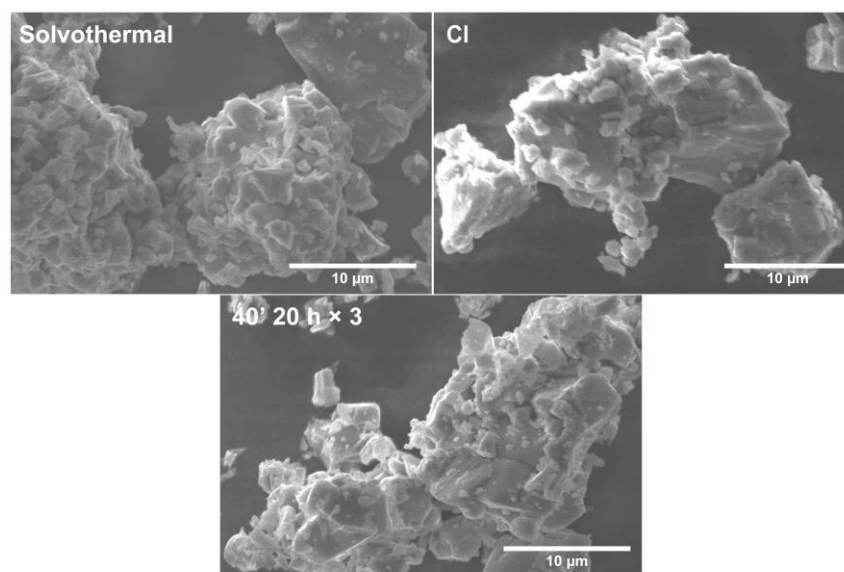

**Figure S11.** SEM images of solvothermal (top left), sol-gel\_Cl (top right) and solid state 40' 20 h × 3 reactions. All samples show similar morphology.

### Thermogravimetric analysis (TGA)

#### **Method**

Thermogravimetric analysis (TGA) was performed in a combined mode on dry powder using a heat flux TGA/DSC 3+ device from Mettler Toledo. All measurements were carried out under an air atmosphere (flow of  $80 \text{ ml} \cdot \text{min}^{-1}$ ). As a reference material for the heat flux DSC, an  $\text{Al}_2\text{O}_3$  crucible was used. Samples were heated from room temperature to 400 or 700 °C with a heating rate of  $10 \text{ }^\circ\text{C min}^{-1}$  and held for 20 h.

#### **Results**

To address the possible loss of  $\text{V}_2\text{O}_5$  due to a higher volatilization ratio, we performed TGA measurements that would simulate the synthesis environment. We used a 40'-milled  $\text{ZrO}_2$  and  $\text{V}_2\text{O}_5$  mixture that was heated to 400 °C and 700 °C and held at the corresponding temperature for 20 h (see Figure S12).

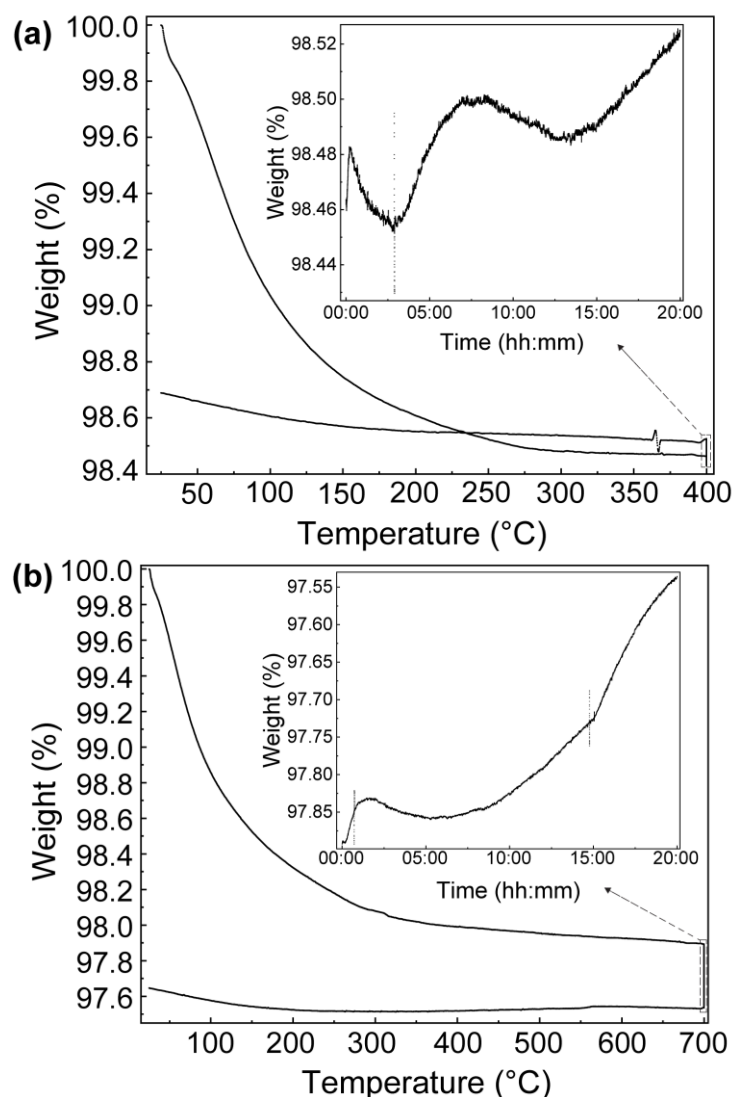

**Figure S12.** TGA of 40' milled  $\text{ZrO}_2$  and  $\text{V}_2\text{O}_5$  mixture heated from room temperature to 400 °C (a) and 700 °C (b) at 10 °C/min rate, held at that temperature for 20 h and cooled down to room temperature at 10 °C/min. Insets show corresponding weight change when holding for 20 h.

The total weight loss was barely 2.4% for the sample heated to 700 °C and 1.3% for the sample heated to 400 °C. We observed the highest decrease in weight % far below an expected  $\text{V}_2\text{O}_5$  sublimation temperature. This loss is most likely attributed to the loss of ethanol and acetic acid (present in the sample due to ethanol grinding media that was used to combine starting oxides). We hypothesize that acetic acid, which was detected after milling experiments, was produced due to ethanol oxidation likely catalysed by the presence of ceramic powders and undergoing mechanochemical reaction. The ethanol evaporation temperature is 78 °C, while the boiling point of acetic acid reaches 118 °C. The sample heated up to 400 °C did not lose any additional weight after reaching 200 °C. The sample that was heated to 700 °C, showed an initial weight loss of ~2 % below sublimation temperature and only an insignificant 0.7 % loss above 400 °C and during a 20 h dwell time at 700 °C. Such small weight loss shows that only a negligible amount of  $\text{V}_2\text{O}_5$  could be lost during heat treatments.

#### References

1. Rodriguez-Carvajal, J. FULLPROF: a program for Rietveld refinement and pattern matching analysis. in vol. 127 (Toulouse, France, 1990).



2. Rodriguez-Carvajal, J. Recent Advances in Magnetic Structure Determination by Neutron Powder Diffraction. *Phys. B Condens. Matter* **192**, 55–69 (1993).
3. Togo, A. & Tanaka, I. First principles phonon calculations in materials science. *Scr. Mater.* **108**, 1–5 (2015).
4. Togo, A., Oba, F. & Tanaka, I. First-principles calculations of the ferroelastic transition between rutile-type and  $\text{CaCl}_2$ -type  $\text{SiO}_2$  at high pressures. *Phys. Rev. B* **78**, 134106 (2008).
5. Gonze, X., Charlier, J.-C., Allan, D. C. & Teter, M. P. Interatomic force constants from first principles: The case of  $\alpha$ -quartz. *Phys. Rev. B* **50**, 13035–13038 (1994).
6. Gonze, X. & Lee, C. Dynamical matrices, Born effective charges, dielectric permittivity tensors, and interatomic force constants from density-functional perturbation theory. *Phys. Rev. B* **55**, 10355–10368 (1997).
7. Miliūtė, A. *et al.* Synthesis and phase purity of the negative thermal expansion material  $\text{ZrV}_2\text{O}_7$ . (2024) doi:10.5281/zenodo.12688634.
